1  
2  
3  
4  
5  
6  
7  
8  
9  
10  
11  
12  
13  
14  
15  
16  
17  
18  
19  
20  
21  
22  
23  
24  
25  
26

Dexamethasone induces senescence of lung epithelial cells and augments TGF- $\beta$ 1-mediated production of the fibrosis mediator serpin E1 (plasminogen activator inhibitor-1).

Francesca. L. Longhorne <sup>1</sup>, Holly N. Wilkinson <sup>2</sup>, Matthew J. Hardman <sup>2</sup>, Simon P. Hart <sup>1\*</sup>

<sup>1</sup> Respiratory Research Group, Hull York Medical School, Castle Hill Hospital, Hull, United Kingdom.

<sup>2</sup> Centre for Atherothrombosis and Metabolic Disease, Hull York Medical School, Hull, United Kingdom.

\*Corresponding author:

Email: [s.hart@hull.ac.uk](mailto:s.hart@hull.ac.uk) (SH)

27 **Abstract**

28 Background: Idiopathic pulmonary fibrosis (IPF) is a progressive, incurable scarring  
29 disease of the lungs with a prognosis worse than most cancers. Pathologically, IPF  
30 is characterised by upregulation of the pro-fibrotic cytokine transforming growth  
31 factor- $\beta$ 1 (TGF- $\beta$ 1), activation of fibroblasts, and deposition of collagen in the  
32 alveolar interstitium. Recent evidence has highlighted the role of senescent type 2  
33 alveolar epithelial cells in the pathogenesis of IPF. In a clinical trial, a treatment  
34 regimen containing a corticosteroid drug accelerated pulmonary fibrosis leading to  
35 more hospitalizations and deaths, particularly in patients with telomere shortening  
36 which drives cellular senescence.

37 Aim: To investigate the potential pro-fibrotic actions of corticosteroids on lung  
38 epithelial cells *in vitro*, including effects on cellular senescence and interactions with  
39 TGF- $\beta$ 1.

40 Methods: The synthetic glucocorticoid dexamethasone (DEX) was incubated with  
41 A549 and BEAS-2B human lung epithelial cells in the presence or absence of TGF-  
42  $\beta$ 1. Cellular senescence was assessed by morphology, senescence-associated  
43 beta-galactosidase (SA  $\beta$ -Gal) expression, and qPCR for transcription of  
44 senescence-associated molecular markers. Conditioned media were screened for  
45 growth factors and cytokines and cultured with human lung fibroblasts. An IPF lung  
46 tissue RNA array dataset was re-analysed with a focus on senescence markers.

47 Results: DEX induced senescence in lung epithelial cells associated with increased  
48 p21 (CDKN1A) expression independently of p16 (CDKN2A) or p53 (TP53). DEX  
49 amplified upregulation of the pro-fibrotic mediator serpin E1/plasminogen activator  
50 inhibitor-1 (PAI-1) in the presence of TGF- $\beta$ 1. The senescence-associated secretory  
51 phenotype from lung epithelial cells treated with DEX plus TGF- $\beta$ 1-treated contained  
52 increased concentrations of GM-CSF and IL-6 and when incubated with primary  
53 human lung fibroblasts there were trends to increased senescence and production of  
54 fibrosis markers. Upregulation of senescence markers was demonstrated by analysis  
55 of an IPF transcriptomic dataset.

56 Discussion: DEX induces senescence in lung epithelial cell lines *in vitro* and interacts  
57 with TGF- $\beta$ 1 to amplify production of the pro-fibrotic mediator serpin E1 (PAI-1). This  
58 may be a mechanism by which corticosteroids promote pulmonary fibrosis in

59 susceptible individuals. Serpin E1/PAI-1 is a potential druggable target in pulmonary  
60 fibrosis.

61

## 62 **Abbreviations**

63 C/M (Conditioned media), DEX (Dexamethasone), EMT (Epithelial-to-mesenchymal  
64 transition), IPF (Idiopathic Pulmonary Fibrosis), NAC (N-Acetylcysteine), PAI-1  
65 (plasminogen activator inhibitor-1), SA  $\beta$ -Gal (senescence-associated beta-  
66 galactosidase), SASP (Senescence-associated secretory phenotype), TGF- $\beta$ 1  
67 (Transforming Growth factor Beta one)

68

## 69 **Introduction**

70 Idiopathic pulmonary fibrosis (IPF) is an incurable lung disease with a median  
71 survival of only 2-5 years from diagnosis due to progressive lung scarring, loss of  
72 lung function, and respiratory failure (1). Pathologically, IPF is characterised by  
73 upregulation of pro-fibrotic cytokines including TGF- $\beta$ 1, fibroblast activation and  
74 accumulation, irregular deposition of collagen in the alveolar walls, and honeycomb  
75 change (2)(3). The cause of IPF remains unknown, but well-established risk factors  
76 include older age (4), prior tobacco smoking, and telomere shortening, all of which  
77 are linked with cellular senescence (5)(6)(7)(8).

78 Recent evidence has highlighted the role of senescent type 2 alveolar epithelial  
79 (AT2) cells in the pathogenesis of IPF (9, 10). Key senescence characteristics have  
80 been consistently observed in IPF lungs, including increased p21 (CDKN1A), p16  
81 (p16INK4a or CDKN2A), p53 (TP53), and  $\beta$ -galactosidase (9)(11-13). Applying  
82 single cell RNA sequencing to IPF lung tissue, Yao et al demonstrated that AT2  
83 alveolar epithelial cells had senescent transcriptomic characteristics and in a  
84 conditional knockout mouse model, triggered senescence of AT2 alveolar epithelial  
85 cells was sufficient to induce pulmonary fibrosis (14).

86 Historically, treatment of IPF with corticosteroid drugs, often in combination with  
87 other immunosuppressants, was adopted worldwide although clinical trial data were  
88 lacking (15). In 2012, interim analysis of the PANTHER-IPF trial (16) reported that

89 combination treatment with the steroid prednisone, azathioprine, and N-  
90 acetylcysteine (NAC) caused more deaths and hospitalizations compared with the  
91 placebo group. The adverse events were predominantly respiratory, indicating that  
92 combination treatment had accelerated pulmonary fibrosis progression rather than  
93 attenuating it. A post hoc subset analysis of PANTHER showed that the adverse  
94 signal with steroid-containing therapy was driven by a subgroup of patients who had  
95 short telomeres (17) and were hence predisposed to premature cellular senescence.

96 We aimed to investigate whether cellular senescence played a role in the fibrosis-  
97 propagating action of corticosteroids, and their interactions with TGF- $\beta$ 1, using  
98 human lung epithelial cell lines *in vitro*. We report that the steroid dexamethasone  
99 (DEX) induced senescence in lung epithelial cells, synergistically increased  
100 transcription of the pro-fibrotic mediator serpin E1/plasminogen activator inhibitor-1  
101 (PAI-1) in the presence of TGF- $\beta$ 1, and the senescence-associated secretory profile  
102 (SASP) produced by these cells may induce fibrosis markers and senescence in  
103 human lung fibroblasts. Published RNA-Array data (18) from IPF lung samples were  
104 re-analysed to link our *in vitro* with *in vivo* findings.

105

## 106 **Materials & methods**

### 107 Cell Culture and Treatments

108 A549 and BEAS-2B cells (ATCC, Middlesex, UK) were maintained in DMEM media  
109 (Thermo Fisher Scientific) with 1% Penicillin/Streptomycin, 1% L-glutamine and 10%  
110 foetal bovine serum (Thermo Fisher Scientific) at 37°C with 5% CO<sub>2</sub>. Cells were  
111 treated for 48 hours with a carrier control (media + phosphate buffered saline),  
112 dexamethasone (HameIn Pharmaceuticals) at concentrations between 10<sup>-8</sup>M and 10<sup>-</sup>  
113 <sup>5</sup>M, TGF- $\beta$ 1 (5 ng/mL, BioRad), or a combination of DEX (10<sup>-6</sup>M) and TGF- $\beta$ 1.  
114 Primary lung fibroblasts were grown from human lung tissue explants (with ethics  
115 committee approval, REC 12/SC/0474) and maintained in DMEM medium up to 7  
116 passages.

### 117 Cell Counting and Staining

118 Cells were lifted using HEPES-buffered saline/EDTA and resuspended in DMEM  
119 media before manual counting from a set volume. For morphology staining, cells

120 were washed in PBS then stained with Shandon™ Kwik-Diff™ (Thermo Scientific).  
121 For senescence-associated beta-galactosidase (SA  $\beta$ -Gal) staining, the methodology  
122 of the chromogenic assay from Debacq-Chainiaux et al. (2009) was adapted and  
123 positive blue cells quantified. Cells were visualised on a Nikon E400 microscope  
124 using brightfield (Image Solutions, Inc. Michigan, US or SPOT imaging, Michigan,  
125 US).

#### 126 Livecyte

127 Cells were treated with conditions and run on the Phasefocus Livecyte™ microscope  
128 for 48 hours. Data were analysed using the Livecyte™ programme for parameters  
129 related to cell morphology, dry mass, and velocity (Phasefocus Ltd, Dashboards:  
130 User Manual, Version 3.0.1).

#### 131 Intracellular and Cell Surface Protein Expression

132 For surface expression, cells were blocked in 0.5% bovine serum albumin (BSA)  
133 (Fisher) and incubated with primary conjugated antibodies for E-Cadherin (CD324),  
134 N-Cadherin (CD325) or EpCAM (CD326), with corresponding isotype controls  
135 (Biolegend®, California, USA). Cells were analysed using flow cytometry (BD  
136 FACSCalibur™), until 10,000 events had been recorded.

137 For intracellular mTOR expression, A549 cells were fixed, blocked and washed with  
138 True-Phos™ Perm Buffer (Biolegend®, California, USA), 0.5% BSA and Cell  
139 Staining Buffer (Biolegend®, California, USA). Cells were incubated with an Anti-  
140 Hu/Mo Phospho-S6 (Ser 235, Ser 236) antibody and corresponding isotype control  
141 (eBioscience™, Invitrogen). Samples were analysed using flow cytometry as above.

#### 142 Conditioned media collection

143 A549 conditioned media (C/M) were generated by treating A549 cells for 48 hours,  
144 discarding supernatants, then adding fresh DMEM media collected after two days.  
145 All samples had matched protein concentrations of approximately 4 $\mu$ g/mL. C/M  
146 collected from treated A549 cells were screened for growth factors and cytokines  
147 using a Human Inflammation and Human Growth antibody array, screening for 40  
148 and 41 targets (Abcam). Mediators showing differing treatment effects results on all  
149 blot replicates were re-plotted making densities relative to the control condition and  
150 positive cytokines results confirmed by ELISA. C/M were diluted 1:4 with fresh

151 medium when added to primary lung fibroblasts over 10 days. Medium was changed  
152 every two days.

### 153 qRT-PCR

154 RNA was extracted from cells using Invitrogen™ TRIzol® reagent (Thermo Fisher  
155 Scientific) and chloroform for fraction separation. The RNA fraction was used with  
156 the Invitrogen™ PureLink™ RNA Mini Kit (Thermo Fisher Scientific) as per the  
157 manufacturer's instructions. RNA was adjusted to 1µg/10µL using NanoDrop  
158 (SimpliNano, Biochrom) then cDNA synthesised using a thermocycler (Techne, TC-  
159 412) and MultiScribe® Reverse Transcriptase from the TaqMan Reverse  
160 Transcription Reagents kit (Applied Biosystems). Gene expression was analysed by  
161 qPCR on a CFX Connect™ thermocycler (Bio-Rad, Hertfordshire, UK), using  
162 Takyon™ SYBR mastermix (Eurogentec, Hampshire, UK). Quality control measures  
163 included using amplification curves between cycles 20-35, efficiency values between  
164 90-110% and R2 value close to 1. Any values that fell outside of these cut-offs were  
165 not used.

### 166 Cytokine Quantification

167 Inflammation cytokine array blots (Abcam) were incubated with A549 C/M as per the  
168 manufacturer's instructions. Blots were visualised using the C-DiGit® scanner  
169 system (LI-COR® Biosciences) and densities quantified using ImageJ (version  
170 1.52t). Confirmation of positive results was performed using ELISA kits for IL-6 and  
171 GM-CSF (Abcam).

### 172 Zymography

173 Acrylamide gels (10%, v/v) containing 0.2% (w/v) porcine gelatin (Thermo Fisher  
174 Scientific) were resolved with a Triton X-100 buffer, stained with 0.1% Amido black  
175 (Fisher) and washed with 10% acetic acid (Fisher Science) as previously described  
176 (19, 20). Band densities were quantified using ImageJ (version 1.52t).

### 177 RNA-Array Data Set Analysis

178 A published data set from DePianto et al. (18) included 40 IPF lung samples and 8  
179 control lung samples. Data were re-analysed using R (version 3.6.1) to compare the  
180 IPF samples to the control samples for generation of principal component analysis

181 (PCA) plots and heatmaps of the most statistically significant variable genes.  
182 Functional annotation and GO enrichment analysis for differentially expressed genes  
183 (DEG) were carried out using the online Database for Annotation, Visualization and  
184 Integrated Discovery (DAVID) (version 6.8) (21-25).

#### 185 Statistical analysis

186 One-way or two-way ANOVA with Dunnett's multiple comparison were performed.  
187 For SA  $\beta$ -Gal counts, data was plotted using percentages with a negative binomial  
188 regression. Analyses were performed using SPSS (version 26), GraphPad (Version  
189 8.0; GraphPad Software, California, US) and R (Version 3.6.2; R Foundation for  
190 Statistical Computing, Vienna, Austria).

191

#### 192 Results

##### 193 DEX treatment does not affect EMT but leads to changes in cell number and 194 morphology

195 We first investigated whether glucocorticoid treatment could induce epithelial-to-  
196 mesenchymal transition (EMT). TGF- $\beta$ 1 significantly reduced surface expression of  
197 epithelial markers E-Cadherin (CD324) and EpCAM (CD326) and upregulated the  
198 mesenchymal marker N-Cadherin (CD325) in A549 cells, but DEX had no effect at  
199 concentrations up to  $10^{-5}$ M either alone or in combination with TGF- $\beta$ 1 (S1 Appendix,  
200 a).

201 Incubation of lung epithelial cells with DEX led to clear differences in cell numbers  
202 and morphology as assessed by light microscopy. Cell numbers significantly  
203 decreased with increasing concentrations of DEX, and cells were enlarged  
204 compared with the carrier control, with significantly increased cell perimeter  
205 measurements (Fig 1, a-c). Similar morphological changes were seen with DEX  
206 treatment of BEAS-2B cells (S1 Appendix, b).

207

208 Fig 1: DEX induces senescence in lung epithelial cells.

209 a) Epithelial cell size increased significantly over 48-hours, from small uniform cells  
210 to enlarged, spread cells, with higher concentrations of DEX, further shown by



211 increased average cell perimeter sizes (b, One-way ANOVA with Dunnett's multiple  
212 comparisons (\*\*/\*\*\*\*:  $p \leq 0.01 / \leq 0.0001$ ) compared to control). Scale bar 0.1mm, error  
213 bars show SEM. c) Epithelial cell counts significantly decreased over 48-hours with  
214 higher concentrations of DEX (Two-way ANOVA with Dunnett's multiple  
215 comparisons (\*\*\*\*:  $p \leq 0.0001$ ) compared to control).

216

### 217 DEX induces expression of senescence-associated $\beta$ -galactosidase (SA $\beta$ -Gal)

218 Cellular senescence is characterised by halted cell division and increased cell size.  
219 As further evidence of senescence following DEX treatment, there was a  
220 concentration-dependent increase in the senescence marker SA  $\beta$ -Gal (Fig 2, a-b).  
221 DEX-induced expression of SA  $\beta$ -Gal was also seen in BEAS-2B cells (S1 Appendix,  
222 c). The combination of the observed changes in A549 cell morphology with positive  
223 SA  $\beta$ -Gal staining indicated that DEX was inducing cellular senescence.

224

225 Fig 2: DEX induces senescence in lung epithelial cells.

226 To assess senescence, SA  $\beta$ -gal staining was used. The number of positive blue  
227 cells (black arrows) significantly increased over time (a) and with stronger DEX  
228 concentrations (b, DEX  $10^{-7}$ M,  $10^{-6}$ M,  $0^{-5}$ M, negative binomial regression analysis,  
229 \*\*\*\*:  $p \leq 0.0001$ ) compared to the carrier control and weakest DEX centration ( $10^{-8}$ M).  
230 Scale bar 0.02mm, error bars show SEM.

231

### 232 DEX-induced senescence is associated with transcription of p21 and Serpin E1/PAI- 233 1 but not p16 or p53

234 Gene expression of senescence markers in lung epithelial cells was investigated  
235 after incubation DEX with or without TGF- $\beta$ 1, a potent inducer of fibrosis (Fig 3, a).  
236 DEX alone significantly increased transcription of p21 (*CDKN2A*) in A549 cells at 24  
237 and 48 hours, and in BEAS-2B cells at 48 hours (Fig 3, b), in keeping with the time  
238 course of induction of senescence. In contrast, DEX-induced senescence was not  
239 associated with increased transcription of p16 (*CDKN1A*), p53 (*TP53*), or Serpin  
240 E1/PAI-1 (*SERPINE1*). However, in the presence of TGF- $\beta$ 1, DEX synergistically



241 enhanced the increase in Serpin E1/PAI-1, an effect that was seen in both A549 and  
242 BEAS-2B cells (Fig 3, a-b).

243

244 Fig 3: Senescence associated genes in lung epithelial cells.

245 a) DEX treatments caused significant increases in the senescence marker *CDKN2A*  
246 (p21), and TGF- $\beta_1$  treatments caused significant increases in the senescence and  
247 fibrosis marker *SERPINE1* (Serpin E1 or PAI-1) in alveolar epithelial (A549) cells.  
248 Interestingly, a combination of TGF- $\beta_1$  and DEX caused a significant additive effect  
249 in *SERPINE1* expression. Significant decreases were seen in *TP53* (p53) and  
250 *CDKN1A* v(p16) following treatments mainly at 48 hours.

251 b) Similar patterns were seen in bronchial epithelial (BEAS-2B) cells at 48 hours;  
252 combination treatments caused significant increases in the marker *CDKN2A* (p21)  
253 and *SERPINE1* (serpinE1/PAI-1).

254 Gene expression displayed as a ratio to the control treatment, n=3, error bars denote  
255 SEM. Outlined bar denotes 48h (a only). Two-way ANOVA with Dunnett's multiple  
256 comparison or Sidak's multiple comparison. \*/\*\*/\*\*\*/\*\*\*\*: p $\leq$ 0.05/  $\leq$ 0.01/  $\leq$ 0.001/  
257  $\leq$ 0.0001.

258

259 DEX-induced senescence is not associated with mTOR activation

260 Summer et al. (26) reported that the mTOR axis was increased in senescent lung  
261 epithelial cells and that when mTOR was blocked, cellular senescence was reduced.  
262 However, in the presence or absence of TGF- $\beta_1$ , DEX-induced senescence in A549  
263 cells was not associated with any demonstrable changes in rapamycin-inhibitable  
264 mTORC1 activation as assessed by pS6RP phosphorylation (S2 Appendix).

265

266 Conditioned media components

267 Conditioned media (C/M) from DEX-treated A549 cells were collected to analyse  
268 potential components of a senescence-associated secretory phenotype (SASP). C/M  
269 collected from treated A549 cells were screened for growth and inflammation factors

270 using multiplex array blots (Fig 4, a) and positive results confirmed by ELISA (Fig 4,  
271 b). Concentrations of growth factors were universally low in A549 conditioned media  
272 with all treatments. In terms of inflammatory mediators, the most varied cytokines in  
273 the multiplex array blots (Fig 4, a) were granulocyte-macrophage colony-stimulating  
274 factor (GM-CSF) and interleukin-6 (IL-6). ELISA confirmed that in response to TGF-  
275  $\beta$ 1, IL-6 production increased significantly. DEX alone suppressed IL-6 as expected,  
276 but in the presence of TGF- $\beta$ 1 the increase in IL-6 was resistant to suppression by  
277 DEX (Fig 4, b). GM-CSF was suppressed by DEX, TGF- $\beta$ 1 alone had no effect, but  
278 the combination of DEX + TGF- $\beta$ 1 appeared to increase GM-CSF although this  
279 could not be confirmed statistically (Fig 4, b). The concentrations of IL-6 and GM-  
280 CSF fell within pathologically meaningful ranges reported in the literature (27-31).

281

282 Fig 4: SASP components in lung epithelial cells.

283 Measuring SASP on cytokine array blots (a) revealed two specific cytokine  
284 increases, GM-CSF with the dual condition and IL-6 with the TGF- $\beta$ <sub>1</sub> conditions,  
285 which were further quantified and confirmed by ELISA (b). Error bars denote SEM.  
286 Two-way ANOVA with Dunnett's multiple comparison for cytokine array data and  
287 One-way ANOVA with Dunnett's multiple comparison for ELISA data. \*\*/\*\*\*\*  $p \leq 0.01 /$   
288  $\leq 0.0001$ . Quantification of MMPs in SASP (c) revealed no change in MMP-2 and  
289 variable results of MMP-9. Error bars denote SEM with no statistical significance  
290 (One-way ANOVA).

291

292 No evidence of MMPs in conditioned media from DEX-treated lung epithelial cells

293 Matrix metalloproteinases (MMPs) are able to degrade and remodel ECM proteins  
294 including collagens, and defective production or neutralization of MMPs may  
295 contribute to fibrosis (32, 33). Two MMPS of particular interest are MMP-2 and MMP-  
296 9 which are upregulated in the fibrotic lung (34, 35). Zymography was used to look  
297 for activity of MMPs in C/M from A549 cells (Fig 4, c). There was no difference in  
298 MMP-2 activity between conditions. For MMP-9, activity increased with TGF- $\beta$ 1 but  
299 DEX had no effect.

300

301 Effects of conditioned media from DEX-treated A549 cells on primary lung fibroblasts

302 To determine potential pro-fibrotic effects of the SASP, we cultured human lung  
303 fibroblasts in C/M from senescent lung epithelial cells. After 10 days' incubation with  
304 C/M from DEX-treated A549 cells, primary human lung fibroblasts lost their  
305 elongated, spindle-like form and became enlarged and more rounded, with more SA  
306  $\beta$ -Gal positive cells indicating senescence (S3 Appendix, a). The morphology of  
307 fibroblasts made quantification challenging and statistical significance could not be  
308 demonstrated. Fibroblasts incubated with C/M from TGF- $\beta$ 1-treated A549 cells  
309 looked similar to the control cells in both morphology and staining. The dual  
310 condition cells demonstrated some spindle-like cells mixed with enlarged, blue  
311 positive cells.

312 Fibrosis- and senescence-associated gene transcription by primary human lung  
313 fibroblasts after 10 days of C/M incubation was also explored (S3 Appendix, b). After  
314 incubation with C/M from DEX-treated A549 cells, there were trends to increased  
315 expression of the fibrosis-associated genes Collagen 1, Collagen 3, Fibronectin, and  
316 Vimentin. Similar levels were seen in the dual C/M cells, indicating that the DEX-  
317 induced A549 C/M had a dominant effect on fibroblast gene expression over TGF-  
318  $\beta$ 1. Overall, TGF- $\beta$ 1 C/M had the same effect as the carrier control. There was no  
319 detectable induction of senescence-associated genes p21 or Serpin E1 in  
320 fibroblasts.

321 IPF patient RNA-Array lung profiles: linking *in vitro* to *in vivo*

322 Re-analysis of a bulk transcriptomic dataset (18) of IPF lung samples (29 explants,  
323 11 biopsies) confirmed that IPF lung samples were clustered away from control lung  
324 samples, with two distinct populations on the PCA plot and the heatmap of the 250  
325 most variable genes (Fig 5, a). 14 cellular processes involving the most differentially  
326 expressed genes were highlighted using DAVID (Database for Annotation,  
327 Visualization and Integrated Discovery), including upregulation of 'ECM', 'Immune  
328 Response' and 'p53 signalling pathway' and downregulation of 'cell adhesion' and  
329 'angiogenesis' (Fig 5, b). Enrichment analysis of the 10 upregulated pathways  
330 showed the fold change of the genes in those pathways, with 'Tissue inhibitors of  
331 matrix metalloproteinases (TIMP)' and 'Transforming Growth Factor-beta' being the  
332 most upregulated.

333

334 Fig 5: IPF patient lung profile.

335 Published RNA-Array data analysis comparing IPF to control lung samples, shows  
336 clear sample clustering on a PCA plot and the spread of data on a heat map of 250  
337 most variable (up- or down-regulated) genes (a). b) DAVID analysis shows the  
338 biological processes with the most up- or down-regulated genes in the IPF data set,  
339 highlighting fibrosis-related or senescence-related pathways. The enrichment graph  
340 shows the fold change of the most up-regulated genes in the IPF data (Enrichment  
341 key: I: Extracellular Matrix, II: Immune Response, III: Cell Adhesion, IV: Apoptosis, V:  
342 Tissue inhibitors of matrix metalloproteinases (TIMP), VI: Response to Drug, VII: p53  
343 Signaling Pathway, VIII: IGF Binding Protein (IGFBP), IX: Cellular Response to FGF,  
344 X: Transforming Growth Factor-beta. Differentially expressed gene (DEG) analysis  
345 (c) of seven genes related to this body of work, shows key senescence genes are  
346 upregulated in IPF, as well as collagens and the cytokine IL-6.

347

348 Next, Gene Ontology Go enrichment analysis was used to explore genes of interest  
349 in our study: Serpin E1, p21, p16, p53, GM-CSF, IL-6 and collagens 1 and 3. Serpin  
350 E1 was not identified in the 250 most differentially expressed genes. In the IPF lung  
351 dataset, GM-CSF was downregulated while p21, p16, p53, IL-6, collagen 1 and  
352 collagen 3 were upregulated (Fig 5, c).

353

## 354 **Discussion**

355 Corticosteroids exert multiple mechanisms to dampen inflammation directly or  
356 indirectly (36), particularly by repressing transcription of pro-inflammatory cytokines  
357 (37). Anti-inflammatory treatment with corticosteroids was widely used for IPF on the  
358 basis that fibrosis ensued because of chronic inflammation, until practice changed  
359 following publication of the major adverse outcomes of the PANTHER-IPF trial in  
360 2012. By that time, alternative concepts of IPF pathogenesis had already been  
361 proposed based whereby fibrosis occurred due to repeated injuries to the lung  
362 epithelium followed by abnormal wound repair (1, 38-40). Recently, evidence has

363 highlighted a key role for senescence of alveolar type 2 epithelial (AT2) cells as a  
364 driver of lung fibrosis (14).

365 Cellular senescence, first described in the 1960s (41), is a state in which cells  
366 remain metabolically active but undergo no cell growth or death as they are in  
367 irreversible cell cycle arrest (42-44). These cells can secrete a senescence-  
368 associated secretory phenotype (SASP) which can lead to further senescence or  
369 pro-fibrotic effects (45). Senescence is thought to have beneficial anti-tumour and  
370 anti-viral effects (46-48). Senescence occurs naturally with increasing age along with  
371 reduction in telomere length and is classed as a hallmark of aging (5). Other triggers  
372 of cell senescence include oxidative stress and DNA damage caused by drugs or  
373 cytokines (5, 44, 49, 50).

374 Senescent cells show characteristic morphology, becoming enlarged and flatter,  
375 which we observed in A549 cells treated with pharmacologically relevant  
376 concentrations of DEX (51, 52). Peak plasma concentrations around 0.2 $\mu$ M (2x10<sup>-7</sup>  
377 M) are found in response to treatment with 6mg or oral dexamethasone daily (53),  
378 which equates to doses of prednisone used in PANTHER. We confirmed increased  
379 expression of intracellular SA  $\beta$ -Gal, a widely accepted biomarker for senescence  
380 (52) in response to DEX (54, 55). In the present study, p21 and Serpin E1 increased  
381 in association with DEX-induced senescence, but there was no increase in p16 or  
382 p53. Generally, cellular senescence can be induced by through one of two major  
383 mechanisms: activation of p53–p21 or p16INK4a–pRB pathways. Lehmann et al.  
384 (13) demonstrated increased p16 and p21 in IPF lung tissue versus control tissue, as  
385 well as bleomycin-induced fibrotic mouse lungs. The p53-p21 pathway has been  
386 linked to telomere-initiated cellular senescence when dysfunctional telomere  
387 shortening triggers a DNA damage response within the cell. Telomere shortening,  
388 with or without mutations in the TERT telomerase complex is a recognized risk factor  
389 for IPF. In the present study, DEX induced senescence in lung epithelial cells was  
390 mediated by p21 independently of p53 (56).

391 Serpin E1/PAI-1 increased in response to TGF- $\beta$ 1 (57), an effect which was enhanced  
392 in combination with DEX. SerpinE1/PAI-1 is produced by AT2 cells and may promote  
393 pulmonary fibrosis by inhibiting tPA/uPA and hence blocking degradation of ECM  
394 leading to its accumulation (57), and potentially and via interaction with its receptor

395 LRP1 on fibroblasts or macrophages (58). We also recognise serpin E1/PAI-1  
396 expression as a marker of senescence in AT2 and other cells (59-61). Serpin  
397 E1/PAI-1 can be activated by p53 (62, 63), but not in our model of p53-independent  
398 senescence induced by DEX. TGF- $\beta$ 1 is an archetypal inducer of tissue fibrosis by  
399 activating fibroblasts to become collagen-synthesizing myofibroblasts, and also  
400 induces epithelial cells to adopt a mesenchymal phenotype (epithelial-to-  
401 mesenchymal transition (EMT)) (64-66). Rana et al. (61) showed that TGF- $\beta$ 1  
402 induced senescence in primary rodent ATII cells *ex vivo* associated with increased  
403 serpin E1/PAI-1 production, and that blocking PAI-1 diminished senescence and  
404 SASP-mediated activation of alveolar macrophages.

405 The senescence associated secretory phenotype (SASP) describes a mixture of  
406 growth factors and cytokines released by senescent cells that can have impactful  
407 effects on nearby cells (6, 67-70). In this study, we analysed conditioned media from  
408 DEX-treated senescent A549 cells with or without TGF- $\beta$ 1 for growth factors and  
409 cytokines that may influence fibrosis in the lung. We did not find detectable levels of  
410 growth factors implicated in fibrosis such as TGF- $\beta$ , PDGF, FGF, or VEGF. DEX is a  
411 general repressor of inflammatory cytokine transcription, in keeping with our finding  
412 of suppression of several cytokines in our array. We did not find any cytokines that  
413 were upregulated is the SASP from DEX-induced senescent epithelial cells.  
414 However, combined incubation with DEX plus TGF- $\beta$ , designed to mimic the milieu in  
415 the fibrotic lung, induced secretion of IL-6 and GM-CSF.

416 IL-6 is multifunctional inflammatory cytokine (49, 71) that has been linked to  
417 pulmonary fibrosis (72-75). In response to DEX alone, basal IL-6 production from  
418 A549 cells was suppressed as expected. As TGF- $\beta$ 1 is a known inducer of fibrosis, it  
419 was interesting to see IL-6 significantly increased in response to TGF- $\beta$ 1 at that  
420 TGF- $\beta$ 1-stimulated IL-6 was resistant to suppression by DEX. This finding may partly  
421 explain why corticosteroid therapy does not work for patients with IPF when there is  
422 a TGF- $\beta$ 1-rich milieu within the fibrotic lung. GM-CSF, involved with activation and  
423 proliferation of macrophages and immune cells (76) appeared to increase with the  
424 combination of DEX plus TGF- $\beta$ 1 but this result should be confirmed in further  
425 experiments.



426 Proteinases are important in fibrotic lung disease as they contribute to the  
427 degradation of ECM, which can aid remodelling and may be potential targets for IPF  
428 therapies. MMP-2 and MMP-9, gelatinase A and B respectively, have been shown to  
429 be increased in IPF and other chronic remodelling diseases (35, 77, 78). In this  
430 study, DEX did not affect MMP-2 or -9 from A549 cells, but TGF- $\beta$ 1 increased MMP-  
431 9, which itself can activate latent TGF- $\beta$ 1 (77).

432 Activated fibroblasts are the primary source of the excessive collagen-rich ECM seen  
433 in pulmonary fibrosis (79, 80). If factors within the SASP from DEX-treated epithelial  
434 cells could stimulate fibroblasts to produce more ECM, this may worsen lung fibrosis.  
435 C/M from DEX-treated A549 cells caused more positive SA  $\beta$ -Gal staining in primary  
436 lung fibroblasts and there were trends to increased expression of collagen and ECM-  
437 associated genes. This suggests that the effects of DEX on epithelial cells will in turn  
438 affect lung fibroblasts to become pro-fibrotic, and has the potential to effect other  
439 cells too, warranting further investigation. Whilst our RNA transcription data indicate  
440 that the SASP from DEX plus TGF- $\beta$ 1-conditioned A549 cells is likely to contain  
441 increased amounts of serpin E1/PAI-1, apparent contradictory effects of serpin  
442 E1/PAI-1 on fibroblasts compared with epithelial cells have been reported (81).

443 To link our *in vitro* data to *in vivo* evidence, we re-analysed a published bulk RNA  
444 array dataset that compared IPF lung tissue (from biopsies or explants) with control  
445 lung tissue (18). We replicated distinct transcriptomic populations of control and IPF  
446 samples (82-84). Using DAVID and enrichment analysis, we identified upregulation  
447 of senescence-associated pathways, as well as expected fibrosis pathways such as  
448 ECM. Using DEG analysis, all three senescence markers p16, p21, and p53 were  
449 increased in IPF lung. IL-6 was increased while GM-CSF decreased. Serpin E1/PAI-  
450 1 was not listed among the significantly differentially expressed genes. Fibrosis  
451 related genes collagen 1 and 3 were also upregulated. DePianto et al. (18) used  
452 whole lung tissue in their RNA array, so upregulation in epithelial cells could be  
453 masked by other cell types in the tissue. We do not know how many of the IPF  
454 subjects were taking corticosteroid therapy at the time of their biopsy or transplant.

455 Our study has several limitations. The use of A549 cells to model lung epithelium  
456 has been criticized due to these cells being derived from a patient with lung  
457 adenocarcinoma. In studies of DNA damage, A549 cells may exhibit heightened



458 increased oxidative stress responses due to a mutation in KEAP1 (85). However,  
459 A549s share many features of AT2 cells (86), dysfunction of which has been heavily  
460 implicated in pulmonary fibrosis. In our model they reproducibly underwent  
461 senescence in response to pharmacologically relevant concentrations of  
462 dexamethasone, and we suggest they may be a good model to study potentially pro-  
463 fibrotic mechanisms in lung epithelium. Importantly, we reproduced our findings in  
464 BEAS-2B cells, which are ontogenically differently from A549 cells, being derived  
465 from the bronchial epithelium of a subject without cancer, transformed *in vitro* by  
466 transfection with an adenovirus 12-SV40 hybrid virus. An important caveat is the  
467 study of p16 in senescence, since A549 cells (and many other cell lines) harbour a  
468 genetic deletion in p16 that impairs the function of the p16INK4A protein (87). This is  
469 consistent with our results where we detected small amounts of p16 gene  
470 expression, but no upregulation with induction of senescence.

471 The experiments using SASP-containing conditioned media are constrained by the  
472 need to dilute the C/M in growth media when treating fibroblasts, meaning that any  
473 active SASP component was diluted fourfold which may diminish the ability to detect  
474 meaningful downstream effects. The variability seen, likely compounded using  
475 primary cells from different donors, prevented demonstration of statistical  
476 significance so these finding are regarded as exploratory only.

477 We did not study primary human AT2 cells which are challenging to isolate and  
478 short-lived in culture. We would not expect primary epithelial cells from healthy  
479 individuals to exhibit senescence in response to dexamethasone. Corticosteroids  
480 have been widely used to treat asthma for decades, both via inhaled and systemic  
481 routes (for acute exacerbations), and to our knowledge senescence of epithelial cells  
482 has never been reported in steroid-treated asthmatics. Indeed, rather than inducing  
483 senescence, there has been a single report that steroids may induce bronchial  
484 epithelial cell programmed cell death (apoptosis) (88), although the clinical relevance  
485 of these data have been challenged (89). We hypothesize that primary AT2 cells  
486 from older individuals with IPF, particularly those with short telomeres, would be  
487 more susceptible to steroid-triggered senescence. To confirm whether accelerated  
488 senescence of susceptible AT2 cells could be responsible for steroid-induced  
489 accelerated fibrosis in IPF, further research would need to study AT2 cells from

490 lungs of IPF patients with short telomeres, who we hypothesize are predisposed to  
491 steroid-induced senescence.

492

493 In conclusion, our findings support a potential profibrotic effect of corticosteroids in  
494 lung fibrosis by inducing senescence of 'susceptible' AT2 cells and upregulating  
495 serpinE1 in the presence of TGF- $\beta$ 1. There has been interest in "senolytic" drugs  
496 that target senescent cells to die by apoptosis (90, 91), with a feasibility study in 14  
497 IPF patients with the combination therapy of dasatinib and quercetin (91). Caution is  
498 required in attributing effects to removing senescent cells because of possible 'off-  
499 target' non-senolytic effects of these drugs. An alternative approach of blocking  
500 senescence is not a desirable therapeutic aim for patients due to the important role  
501 of senescence in limiting carcinogenesis and viral infections. More specific  
502 ("senomorphic") targeting of serpin E1/PAI-1 and other senescence-associated  
503 pathways that promote fibrosis should be sought (60).

504

505

506

507

508

509

510

511

512

513

514

515

516

517 **References**

- 518 1. Harari S, Caminati A. IPF: new insight on pathogenesis and treatment. *Allergy*.  
519 2010;65(5):537-53.
- 520 2. Raghu G, Nicholson AG, Lynch D. The classification, natural history and  
521 radiological/histological appearance of idiopathic pulmonary fibrosis and the other idiopathic  
522 interstitial pneumonias. *European Respiratory Review*. 2008;17(109):108-15.
- 523 3. Baddini-Martinez J, Baldi BG, Costa CH, Jezler S, Lima MS, Rufino R. Update on diagnosis and  
524 treatment of idiopathic pulmonary fibrosis. *J Bras Pneumol*. 2015;41(5):454-66.
- 525 4. King TE, Pardo A, Selman M. Idiopathic pulmonary fibrosis. *The Lancet*.  
526 2011;378(9807):1949-61.
- 527 5. Lopez-Otin C, Blasco MA, Partridge L, Serrano M, Kroemer G. The hallmarks of aging. *Cell*.  
528 2013;153(6):1194-217.
- 529 6. Mailleux AA, Crestani B. Licence to kill senescent cells in idiopathic pulmonary fibrosis? *Eur*  
530 *Respir J*. 2017;50(2).
- 531 7. Campisi J, d'Adda di Fagagna F. Cellular senescence: when bad things happen to good cells.  
532 *Nat Rev Mol Cell Biol*. 2007;8(9):729-40.
- 533 8. Alder JK, Chen JJ, Lancaster L, Danoff S, Su SC, Cogan JD, et al. Short telomeres are a risk  
534 factor for idiopathic pulmonary fibrosis. *Proc Natl Acad Sci U S A*. 2008;105(35):13051-6.
- 535 9. Minagawa S, Araya J, Numata T, Nojiri S, Hara H, Yumino Y, et al. Accelerated epithelial cell  
536 senescence in IPF and the inhibitory role of SIRT6 in TGF-beta-induced senescence of human  
537 bronchial epithelial cells. *Am J Physiol Lung Cell Mol Physiol*. 2011;300(3):L391-401.
- 538 10. Okuda R, Aoshiba K, Matsushima H, Ogura T, Okudela K, Ohashi K. Cellular senescence and  
539 senescence-associated secretory phenotype: comparison of idiopathic pulmonary fibrosis,  
540 connective tissue disease-associated interstitial lung disease, and chronic obstructive pulmonary  
541 disease. *J Thorac Dis*. 2019;11(3):857-64.
- 542 11. Chilosi M, Carloni A, Rossi A, Poletti V. Premature lung aging and cellular senescence in the  
543 pathogenesis of idiopathic pulmonary fibrosis and COPD/emphysema. *Transl Res*. 2013;162(3):156-  
544 73.
- 545 12. Alvarez D, Cardenes N, Sellares J, Bueno M, Corey C, Hanumanthu VS, et al. IPF lung  
546 fibroblasts have a senescent phenotype. *Am J Physiol Lung Cell Mol Physiol*. 2017;313(6):L1164-L73.
- 547 13. Lehmann M, Korfei M, Mutze K, Klee S, Skronska-Wasek W, Alsafadi HN, et al. Senolytic  
548 drugs target alveolar epithelial cell function and attenuate experimental lung fibrosis ex vivo. *Eur*  
549 *Respir J*. 2017;50(2).
- 550 14. Yao C, Guan X, Carraro G, Parimon T, Liu X, Huang G, et al. Senescence of Alveolar Type 2  
551 Cells Drives Progressive Pulmonary Fibrosis. *Am J Respir Crit Care Med*. 2021;203(6):707-17.
- 552 15. Bradley B, Branley HM, Egan JJ, Greaves MS, Hansell DM, Harrison NK, et al. Interstitial lung  
553 disease guideline: the British Thoracic Society in collaboration with the Thoracic Society of Australia  
554 and New Zealand and the Irish Thoracic Society. *Thorax*. 2008;63 Suppl 5:v1-58.
- 555 16. Idiopathic Pulmonary Fibrosis Clinical Research N, Raghu G, Anstrom KJ, King TE, Jr., Lasky JA,  
556 Martinez FJ. Prednisone, azathioprine, and N-acetylcysteine for pulmonary fibrosis. *N Engl J Med*.  
557 2012;366(21):1968-77.
- 558 17. Newton CA, Zhang D, Oldham JM, Kozlitina J, Ma SF, Martinez FJ, et al. Telomere Length and  
559 Use of Immunosuppressive Medications in Idiopathic Pulmonary Fibrosis. *Am J Respir Crit Care Med*.  
560 2019;200(3):336-47.
- 561 18. DePianto DJ, Chandriani S, Abbas AR, Jia G, N'Diaye EN, Caplazi P, et al. Heterogeneous gene  
562 expression signatures correspond to distinct lung pathologies and biomarkers of disease severity in  
563 idiopathic pulmonary fibrosis. *Thorax*. 2015;70(1):48-56.
- 564 19. Wilkinson HN, Iveson S, Catherall P, Hardman MJ. A Novel Silver Bioactive Glass Elicits  
565 Antimicrobial Efficacy Against *Pseudomonas aeruginosa* and *Staphylococcus aureus* in an ex Vivo  
566 Skin Wound Biofilm Model. *Front Microbiol*. 2018;9:1450.

- 567 20. Kasai H, Allen JT, Mason RM, Kamimura T, Zhang Z. TGF-beta1 induces human alveolar  
568 epithelial to mesenchymal cell transition (EMT). *Respir Res.* 2005;6:56.
- 569 21. Huang da W, Sherman BT, Lempicki RA. Systematic and integrative analysis of large gene lists  
570 using DAVID bioinformatics resources. *Nat Protoc.* 2009;4(1):44-57.
- 571 22. Huang da W, Sherman BT, Lempicki RA. Bioinformatics enrichment tools: paths toward the  
572 comprehensive functional analysis of large gene lists. *Nucleic Acids Res.* 2009;37(1):1-13.
- 573 23. Ashburner M, Ball CA, Blake JA, Botstein D, Butler H, Cherry JM, et al. Gene ontology: tool for  
574 the unification of biology. The Gene Ontology Consortium. *Nat Genet.* 2000;25(1):25-9.
- 575 24. Mi H, Muruganujan A, Ebert D, Huang X, Thomas PD. PANTHER version 14: more genomes, a  
576 new PANTHER GO-slim and improvements in enrichment analysis tools. *Nucleic Acids Res.*  
577 2019;47(D1):D419-D26.
- 578 25. Gene Ontology C. The Gene Ontology resource: enriching a GOld mine. *Nucleic Acids Res.*  
579 2021;49(D1):D325-D34.
- 580 26. Summer R, Shaghghi H, Schriener D, Roque W, Sales D, Cuevas-Mora K, et al. Activation of  
581 the mTORC1/PGC-1 axis promotes mitochondrial biogenesis and induces cellular senescence in the  
582 lung epithelium. *American Journal of Physiology-Lung Cellular and Molecular Physiology.*  
583 2019;316(6):L1049-L60.
- 584 27. Robak T, Gladalska A, Stepień H, Robak E. Serum levels of interleukin-6 type cytokines and  
585 soluble interleukin-6 receptor in patients with rheumatoid arthritis. *Mediators Inflamm.*  
586 1998;7(5):347-53.
- 587 28. Bachelot T, Ray-Coquard I, Menetrier-Caux C, Rastkha M, Duc A, Blay JY. Prognostic value of  
588 serum levels of interleukin 6 and of serum and plasma levels of vascular endothelial growth factor in  
589 hormone-refractory metastatic breast cancer patients. *Br J Cancer.* 2003;88(11):1721-6.
- 590 29. Lee J, Kim Y, Lim J, Kim M, Han K. G-CSF and GM-CSF concentrations and receptor expression  
591 in peripheral blood leukemic cells from patients with chronic myelogenous leukemia. *Ann Clin Lab*  
592 *Sci.* 2008;38(4):331-7.
- 593 30. Bhattacharya P, Thiruppathi M, Elshabrawy HA, Alharshawi K, Kumar P, Prabhakar BS. GM-  
594 CSF: An immune modulatory cytokine that can suppress autoimmunity. *Cytokine.* 2015;75(2):261-71.
- 595 31. Jevnikar Z, Ostling J, Ax E, Calven J, Thorn K, Israelsson E, et al. Epithelial IL-6 trans-signaling  
596 defines a new asthma phenotype with increased airway inflammation. *J Allergy Clin Immunol.*  
597 2019;143(2):577-90.
- 598 32. Corbel M, Belleguic C, Boichot E, Lagente V. Involvement of gelatinases (MMP-2 and MMP-9)  
599 in the development of airway inflammation and pulmonary fibrosis. *Cell Biol Toxicol.* 2002;18(1):51-  
600 61.
- 601 33. Giannandrea M, Parks WC. Diverse functions of matrix metalloproteinases during fibrosis.  
602 *Dis Model Mech.* 2014;7(2):193-203.
- 603 34. Pardo A, Selman M. Matrix metalloproteases in aberrant fibrotic tissue remodeling. *Proc Am*  
604 *Thorac Soc.* 2006;3(4):383-8.
- 605 35. Dancer RC, Wood AM, Thickett DR. Metalloproteinases in idiopathic pulmonary fibrosis. *Eur*  
606 *Respir J.* 2011;38(6):1461-7.
- 607 36. Barnes PJ. How corticosteroids control inflammation: Quintiles Prize Lecture 2005. *Br J*  
608 *Pharmacol.* 2006;148(3):245-54.
- 609 37. Barnes PJ, Adcock I. Anti-inflammatory actions of steroids: molecular mechanisms. *Trends*  
610 *Pharmacol Sci.* 1993;14(12):436-41.
- 611 38. Selman M, Pardo A. Idiopathic pulmonary fibrosis: an epithelial/fibroblastic cross-talk  
612 disorder. *Respir Res.* 2002;3:3.
- 613 39. Chambers RC, Mercer PF. Mechanisms of alveolar epithelial injury, repair, and fibrosis. *Ann*  
614 *Am Thorac Soc.* 2015;12 Suppl 1:S16-20.
- 615 40. Daccord C, Maher TM. Recent advances in understanding idiopathic pulmonary fibrosis.  
616 *F1000Res.* 2016;5.

- 617 41. Hayflick L, Moorhead PS. The serial cultivation of human diploid cell strains. *Exp Cell Res.*  
618 1961;25:585-621.
- 619 42. Kuilman T, Michaloglou C, Mooi WJ, Peeper DS. The essence of senescence. *Genes Dev.*  
620 2010;24(22):2463-79.
- 621 43. Rodier F, Campisi J. Four faces of cellular senescence. *J Cell Biol.* 2011;192(4):547-56.
- 622 44. Hernandez-Segura A, Nehme J, Demaria M. Hallmarks of Cellular Senescence. *Trends Cell*  
623 *Biol.* 2018;28(6):436-53.
- 624 45. Campisi J. Aging, cellular senescence, and cancer. *Annu Rev Physiol.* 2013;75:685-705.
- 625 46. Dimri GP. What has senescence got to do with cancer? *Cancer Cell.* 2005;7(6):505-12.
- 626 47. Lynch MD. How does cellular senescence prevent cancer? *DNA Cell Biol.* 2006;25(2):69-78.
- 627 48. Baz-Martinez M, Da Silva-Alvarez S, Rodriguez E, Guerra J, El Motiam A, Vidal A, et al. Cell  
628 senescence is an antiviral defense mechanism. *Sci Rep-Uk.* 2016;6.
- 629 49. Dodig S, Cepelak I, Pavic I. Hallmarks of senescence and aging. *Biochem Med (Zagreb).*  
630 2019;29(3):030501.
- 631 50. Gorgoulis V, Adams PD, Alimonti A, Bennett DC, Bischof O, Bishop C, et al. Cellular  
632 Senescence: Defining a Path Forward. *Cell.* 2019;179(4):813-27.
- 633 51. Wang LJ, Li J, Hao FR, Yuan Y, Li JY, Lu W, et al. Dexamethasone suppresses the growth of  
634 human non-small cell lung cancer via inducing estrogen sulfotransferase and inactivating estrogen.  
635 *Acta Pharmacol Sin.* 2016;37(6):845-56.
- 636 52. Itahana K, Itahana Y, Dimri GP. Colorimetric detection of senescence-associated beta  
637 galactosidase. *Methods Mol Biol.* 2013;965:143-56.
- 638 53. Spoorenberg SM, Deneer VH, Grutters JC, Pulles AE, Voorn GP, Rijkers GT, et al.  
639 Pharmacokinetics of oral vs. intravenous dexamethasone in patients hospitalized with community-  
640 acquired pneumonia. *Br J Clin Pharmacol.* 2014;78(1):78-83.
- 641 54. Patki M, Gadgeel S, Huang Y, McFall T, Shields AF, Matherly LH, et al. Glucocorticoid receptor  
642 status is a principal determinant of variability in the sensitivity of non-small-cell lung cancer cells to  
643 pemetrexed. *J Thorac Oncol.* 2014;9(4):519-26.
- 644 55. Patki M, Huang YF, Wilson M, Fielder A, Matherly L, Polin L, et al. Long-term treatment with  
645 dexamethasone induces senescence and progressive loss of proliferation potential in lung  
646 adenocarcinoma cells expressing high levels of the glucocorticoid receptor. *Journal of Thoracic*  
647 *Oncology.* 2016;11(2):S36-S.
- 648 56. Aliouat-Denis CM, Dendouga N, Van den Wyngaert I, Goehlmann H, Steller U, van de Weyer  
649 I, et al. p53-independent regulation of p21Waf1/Cip1 expression and senescence by Chk2. *Mol*  
650 *Cancer Res.* 2005;3(11):627-34.
- 651 57. Ghosh AK, Vaughan DE. PAI-1 in tissue fibrosis. *J Cell Physiol.* 2012;227(2):493-507.
- 652 58. Sillen M, Declerck PJ. A Narrative Review on Plasminogen Activator Inhibitor-1 and Its  
653 (Patho)Physiological Role: To Target or Not to Target? *International Journal of Molecular Sciences.*  
654 2021;22(5):2721.
- 655 59. Jiang C, Liu G, Luckhardt T, Antony V, Zhou Y, Carter AB, et al. Serpine 1 induces alveolar type  
656 II cell senescence through activating p53-p21-Rb pathway in fibrotic lung disease. *Aging Cell.*  
657 2017;16(5):1114-24.
- 658 60. Adnot S, Breau M, Houssaini A. PAI-1: A New Target for Controlling Lung-Cell Senescence  
659 and Fibrosis? *Am J Respir Cell Mol Biol.* 2020;62(3):271-2.
- 660 61. Rana T, Jiang C, Liu G, Miyata T, Antony V, Thannickal VJ, et al. PAI-1 Regulation of TGF-  
661 beta1-induced Alveolar Type II Cell Senescence, SASP Secretion, and SASP-mediated Activation of  
662 Alveolar Macrophages. *Am J Respir Cell Mol Biol.* 2020;62(3):319-30.
- 663 62. Kunz C, Pebler S, Otte J, von der Ahe D. Differential regulation of plasminogen activator and  
664 inhibitor gene transcription by the tumor suppressor p53. *Nucleic Acids Res.* 1995;23(18):3710-7.
- 665 63. Kortlever RM, Higgins PJ, Bernards R. Plasminogen activator inhibitor-1 is a critical  
666 downstream target of p53 in the induction of replicative senescence. *Nat Cell Biol.* 2006;8(8):877-84.



- 667 64. Verrecchia F, Mauviel A. Transforming growth factor-beta and fibrosis. *World J*  
668 *Gastroenterol.* 2007;13(22):3056-62.
- 669 65. Fernandez IE, Eickelberg O. New cellular and molecular mechanisms of lung injury and  
670 fibrosis in idiopathic pulmonary fibrosis. *Lancet.* 2012;380(9842):680-8.
- 671 66. Fernandez IE, Eickelberg O. The impact of TGF-beta on lung fibrosis: from targeting to  
672 biomarkers. *Proc Am Thorac Soc.* 2012;9(3):111-6.
- 673 67. Rao SG, Jackson JG. SASP: Tumor Suppressor or Promoter? Yes! *Trends Cancer.*  
674 2016;2(11):676-87.
- 675 68. Faget DV, Ren Q, Stewart SA. Unmasking senescence: context-dependent effects of SASP in  
676 cancer. *Nat Rev Cancer.* 2019;19(8):439-53.
- 677 69. Ohtani N. Deciphering the mechanism for induction of senescence-associated secretory  
678 phenotype (SASP) and its role in aging and cancer development. *J Biochem.* 2019;166(4):289-95.
- 679 70. Salotti J, Johnson PF. Regulation of senescence and the SASP by the transcription factor  
680 C/EBPbeta. *Exp Gerontol.* 2019;128:110752.
- 681 71. Doumanov J, Jordanova A, Zlatkov K, Moskova-Doumanova V, Lalchev Z. Investigation of IL-6  
682 Effects on SP-A Expression in A549 Lung Cell Line. *Biotechnology & Biotechnological Equipment.*  
683 2014;26(sup1):96-9.
- 684 72. Tomos I, Manali E, Karakatsani A, Spathis A, Korbila I, Analitis A, et al. IL-6 and IL-8 in stable  
685 and exacerbated IPF patients and their association to outcome. *European Respiratory Journal.*  
686 2016;48(suppl 60):PA3890.
- 687 73. Papis SA, Tomos IP, Karakatsani A, Spathis A, Korbila I, Analitis A, et al. High levels of IL-6  
688 and IL-8 characterize early-on idiopathic pulmonary fibrosis acute exacerbations. *Cytokine.*  
689 2018;102:168-72.
- 690 74. She YX, Yu QY, Tang XX. Role of interleukins in the pathogenesis of pulmonary fibrosis. *Cell*  
691 *Death Discov.* 2021;7(1):52.
- 692 75. Zhang XL, Topley N, Ito T, Phillips A. Interleukin-6 regulation of transforming growth factor  
693 (TGF)-beta receptor compartmentalization and turnover enhances TGF-beta1 signaling. *J Biol Chem.*  
694 2005;280(13):12239-45.
- 695 76. Shiomi A, Usui T. Pivotal roles of GM-CSF in autoimmunity and inflammation. *Mediators*  
696 *Inflamm.* 2015;2015:568543.
- 697 77. Atkinson JJ, Senior RM. Matrix metalloproteinase-9 in lung remodeling. *Am J Respir Cell Mol*  
698 *Biol.* 2003;28(1):12-24.
- 699 78. Craig VJ, Zhang L, Hagood JS, Owen CA. Matrix metalloproteinases as therapeutic targets for  
700 idiopathic pulmonary fibrosis. *Am J Respir Cell Mol Biol.* 2015;53(5):585-600.
- 701 79. McKleroy W, Lee TH, Atabai K. Always cleave up your mess: targeting collagen degradation  
702 to treat tissue fibrosis. *Am J Physiol Lung Cell Mol Physiol.* 2013;304(11):L709-21.
- 703 80. Kleaveland KR, Velikoff M, Yang J, Agarwal M, Rippe RA, Moore BB, et al. Fibrocytes are not  
704 an essential source of type I collagen during lung fibrosis. *J Immunol.* 2014;193(10):5229-39.
- 705 81. Marudamuthu AS, Shetty SK, Bhandary YP, Karandashova S, Thompson M, Sathish V, et al.  
706 Plasminogen activator inhibitor-1 suppresses profibrotic responses in fibroblasts from fibrotic lungs.  
707 *J Biol Chem.* 2015;290(15):9428-41.
- 708 82. Xu Y, Mizuno T, Sridharan A, Du Y, Guo M, Tang J, et al. Single-cell RNA sequencing identifies  
709 diverse roles of epithelial cells in idiopathic pulmonary fibrosis. *JCI Insight.* 2016;1(20):e90558.
- 710 83. Sivakumar P, Thompson JR, Ammar R, Porteous M, McCoubrey C, Cantu E, 3rd, et al. RNA  
711 sequencing of transplant-stage idiopathic pulmonary fibrosis lung reveals unique pathway  
712 regulation. *ERJ Open Res.* 2019;5(3):00117-2019.
- 713 84. Xu Z, Mo L, Feng X, Huang M, Li L. Using bioinformatics approach identifies key genes and  
714 pathways in idiopathic pulmonary fibrosis. *Medicine (Baltimore).* 2020;99(36):e22099.
- 715 85. Singh A, Misra V, Thimmulappa RK, Lee H, Ames S, Hoque MO, et al. Dysfunctional KEAP1-  
716 NRF2 interaction in non-small-cell lung cancer. *PLoS Med.* 2006;3(10):e420.

- 717 86. Cooper JR, Abdullatif MB, Burnett EC, Kempself KE, Conforti F, Tolley H, et al. Long Term  
718 Culture of the A549 Cancer Cell Line Promotes Multilamellar Body Formation and Differentiation  
719 towards an Alveolar Type II Pneumocyte Phenotype. *PLoS One*. 2016;11(10):e0164438.
- 720 87. Kubo A, Nakagawa K, Varma RK, Conrad NK, Cheng JQ, Lee W-C, et al. The p16 Status of  
721 Tumor Cell Lines Identifies Small Molecule Inhibitors Specific for Cyclin-dependent Kinase 4. *Clinical*  
722 *Cancer Research*. 1999;5(12):4279.
- 723 88. White SR, Dorscheid DR. Corticosteroid-induced apoptosis of airway epithelium: a potential  
724 mechanism for chronic airway epithelial damage in asthma. *Chest*. 2002;122(6 Suppl):278S-84S.
- 725 89. Miller-Larsson A, Selroos O. No evidence of glucocorticosteroid-induced apoptosis of airway  
726 epithelial cells *In vivo*. *Am J Respir Crit Care Med*. 2002;165(11):1567; author reply -8.
- 727 90. Zhu Y, Tchkonja T, Pirtskhalava T, Gower AC, Ding H, Giorgadze N, et al. The Achilles' heel of  
728 senescent cells: from transcriptome to senolytic drugs. *Aging Cell*. 2015;14(4):644-58.
- 729 91. Justice JN, Nambiar AM, Tchkonja T, LeBrasseur NK, Pascual R, Hashmi SK, et al. Senolytics in  
730 idiopathic pulmonary fibrosis: Results from a first-in-human, open-label, pilot study. *EBioMedicine*.  
731 2019;40:554-63.
- 732



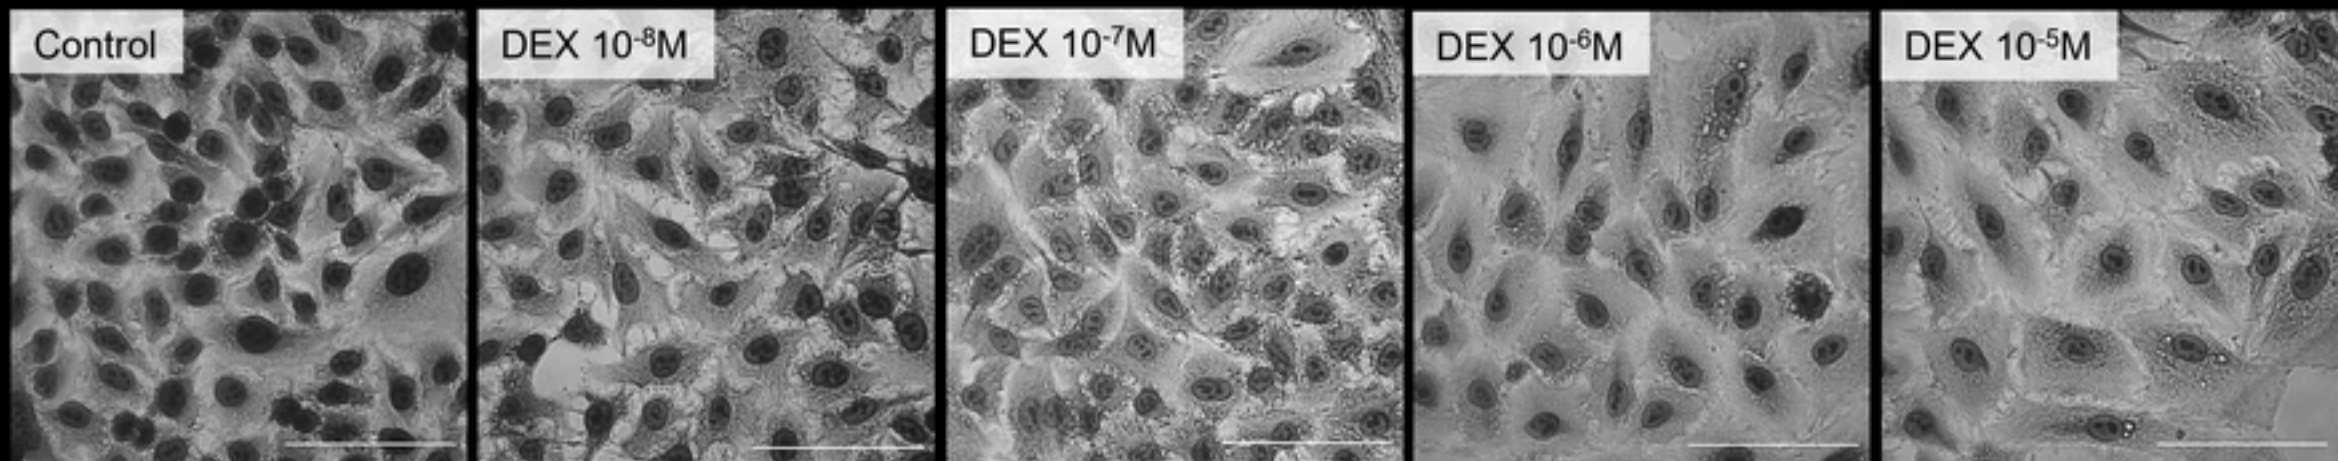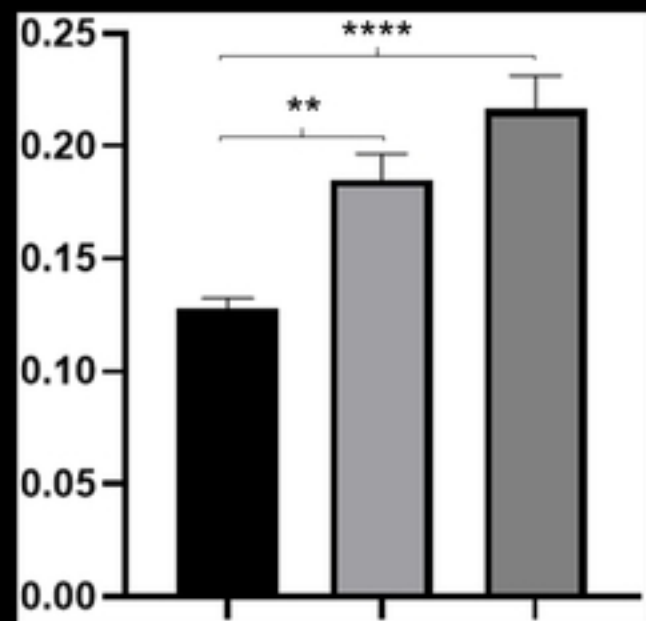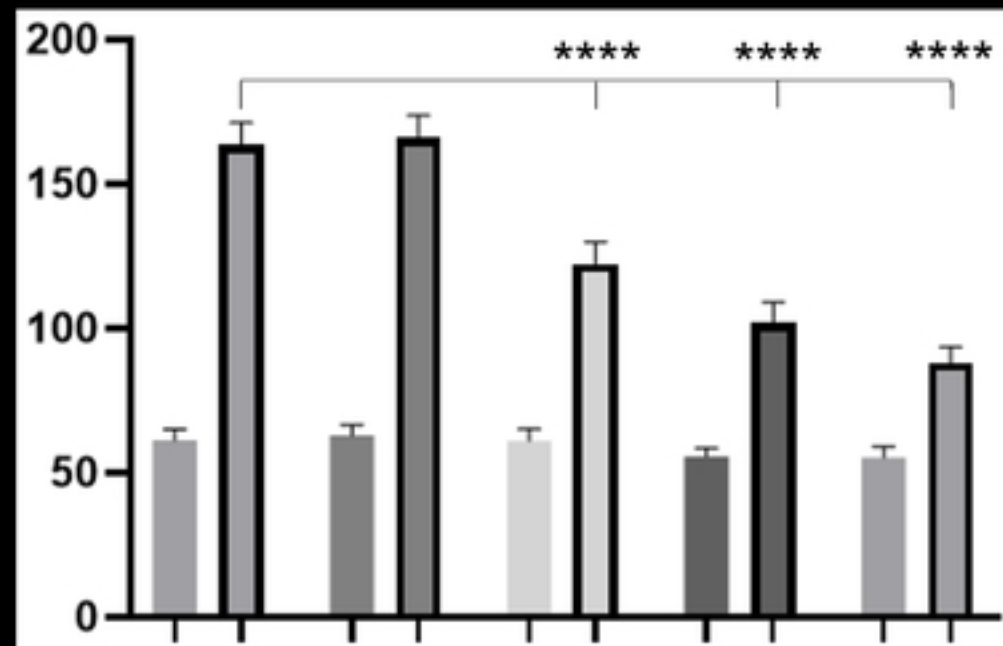

Figure 1

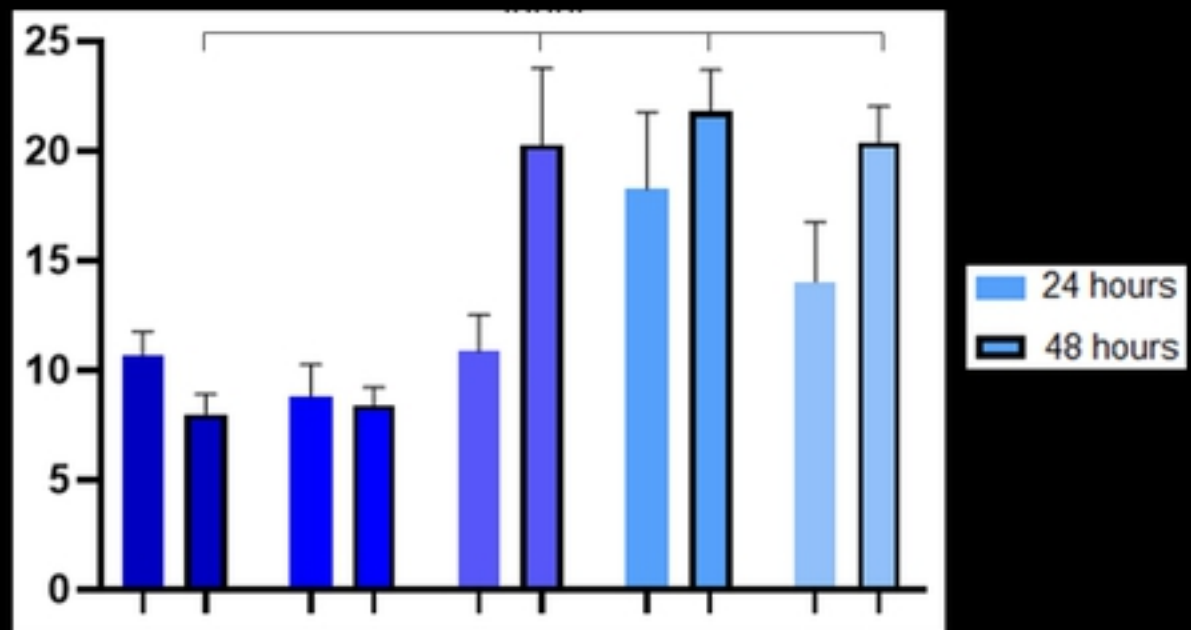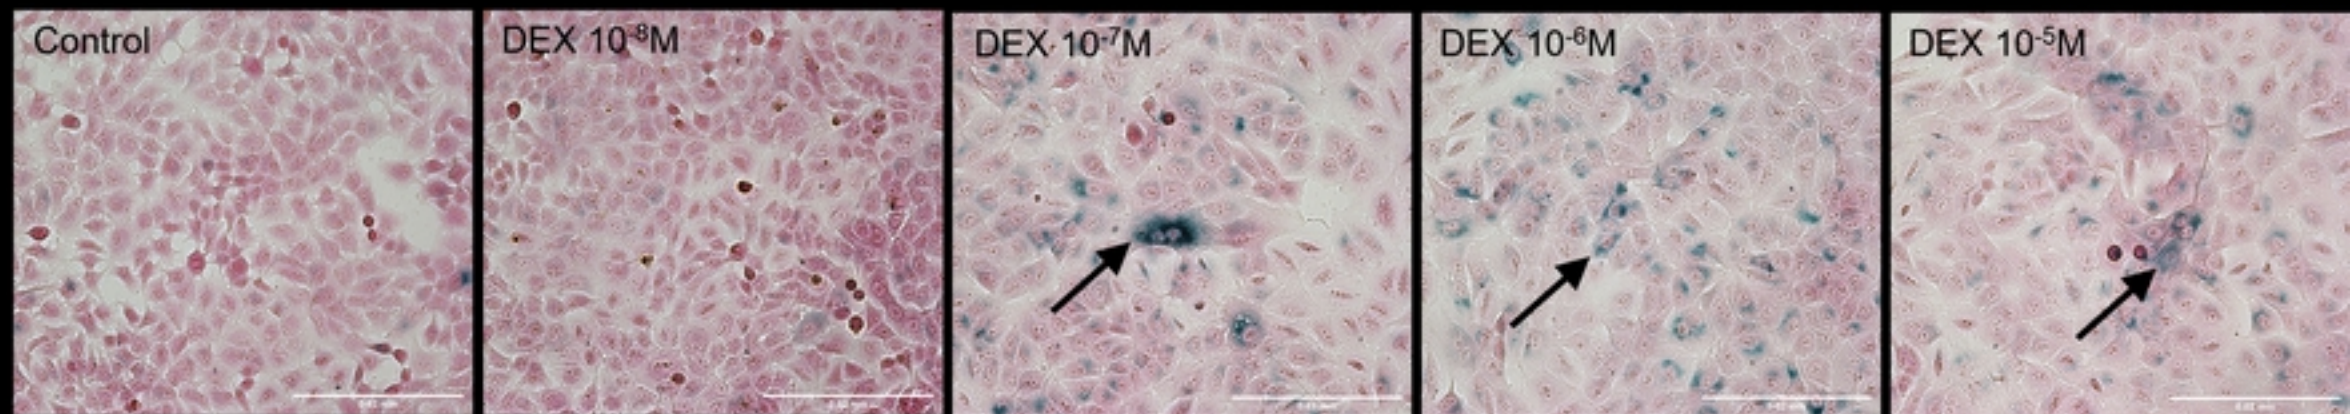

Figure 2

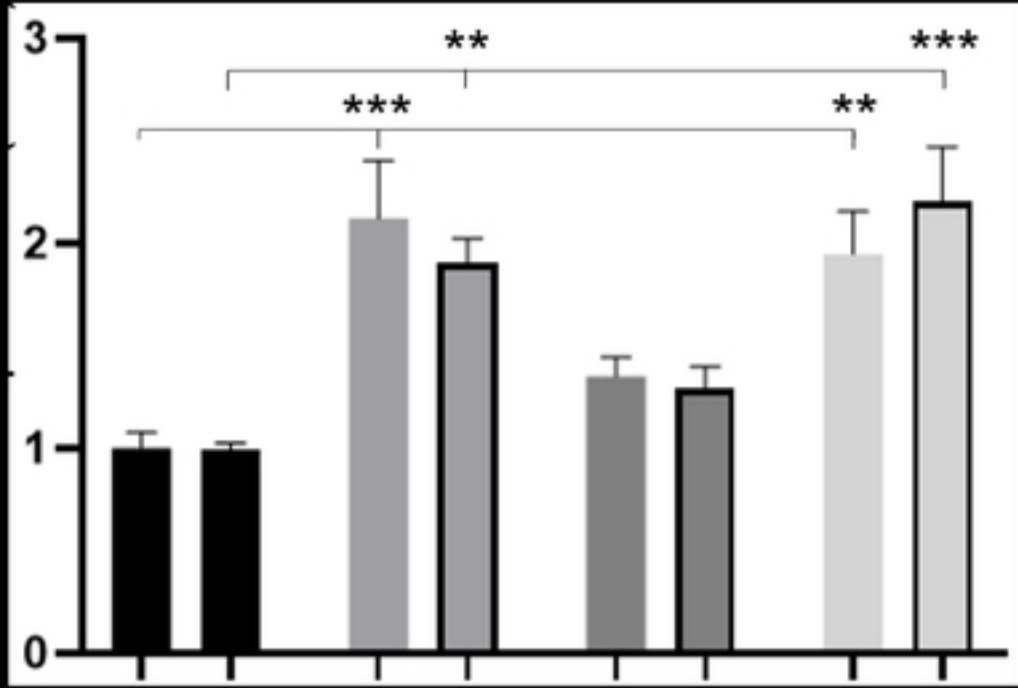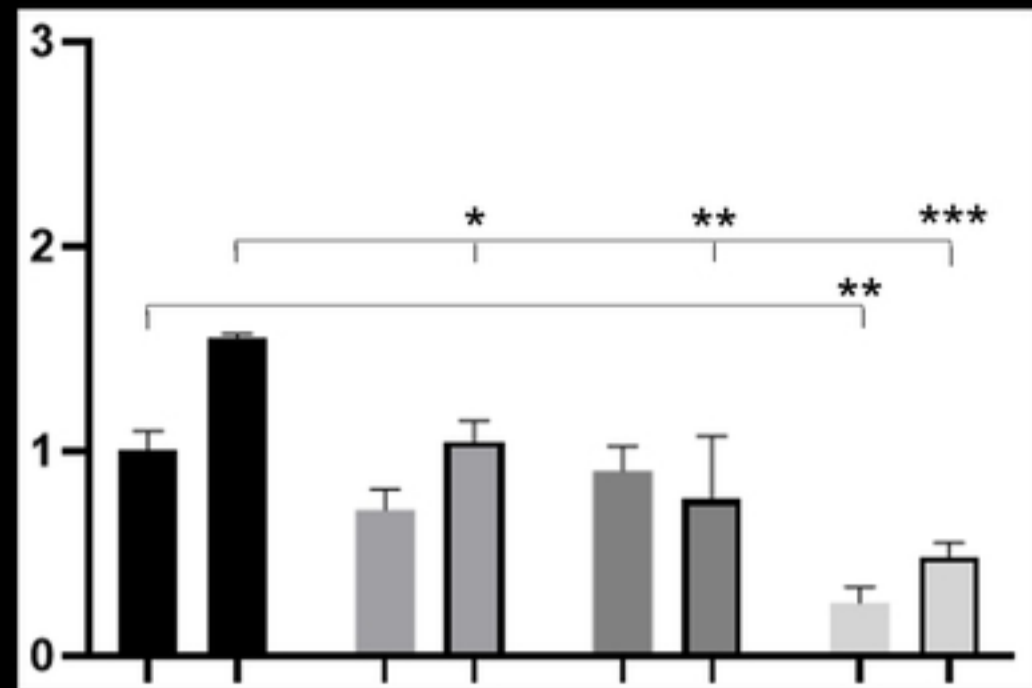

<https://doi.org/10.1101/2021.11.29.470337>

CC-BY 4.0 International license

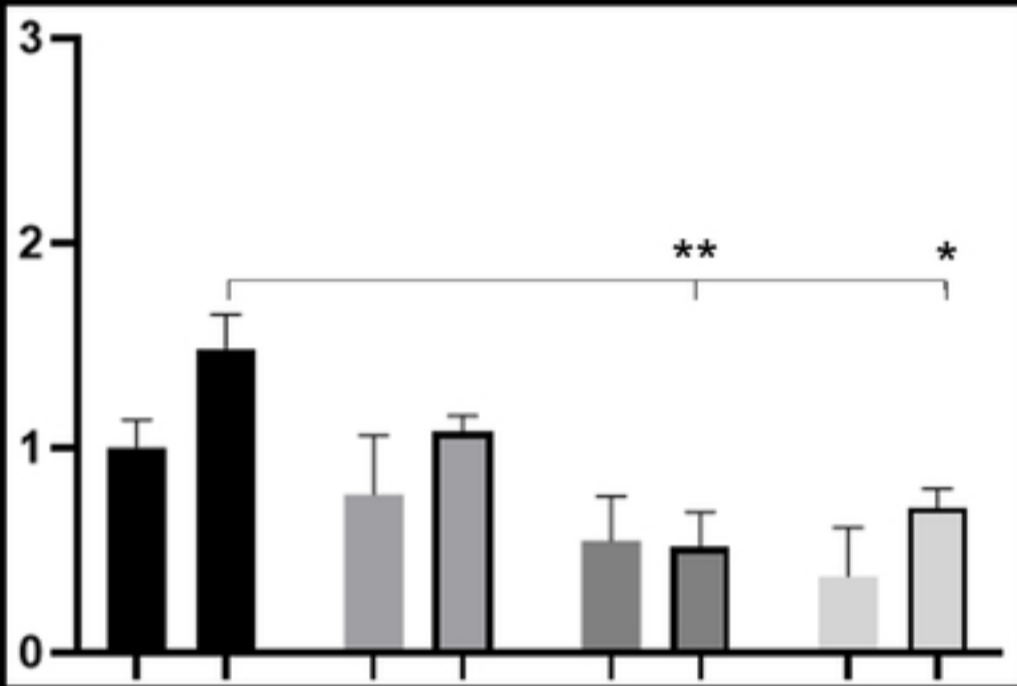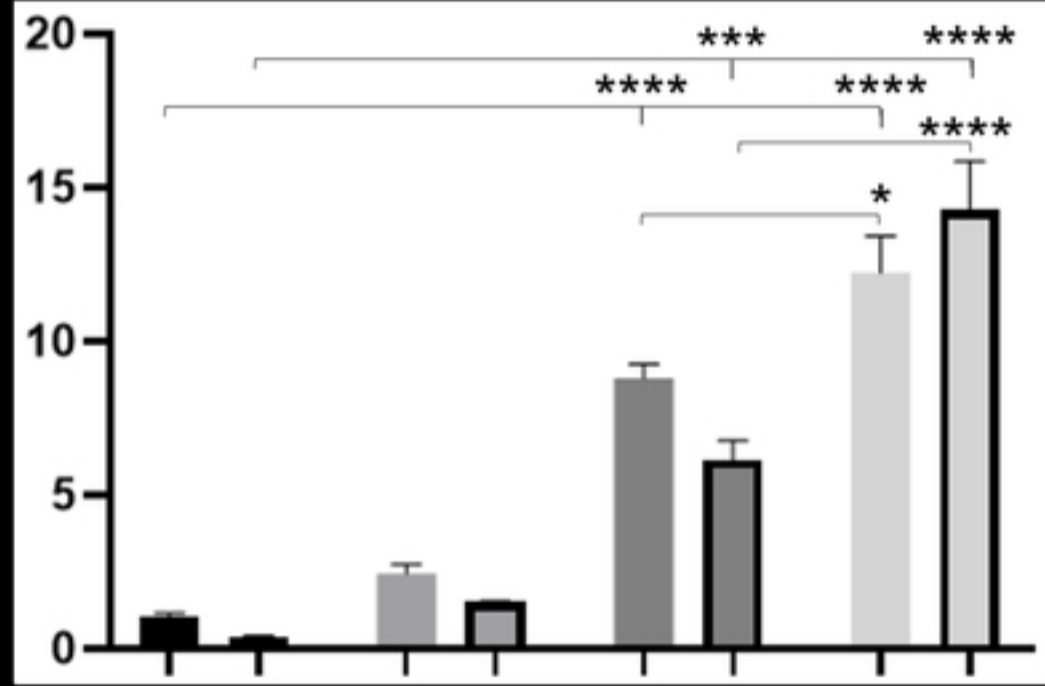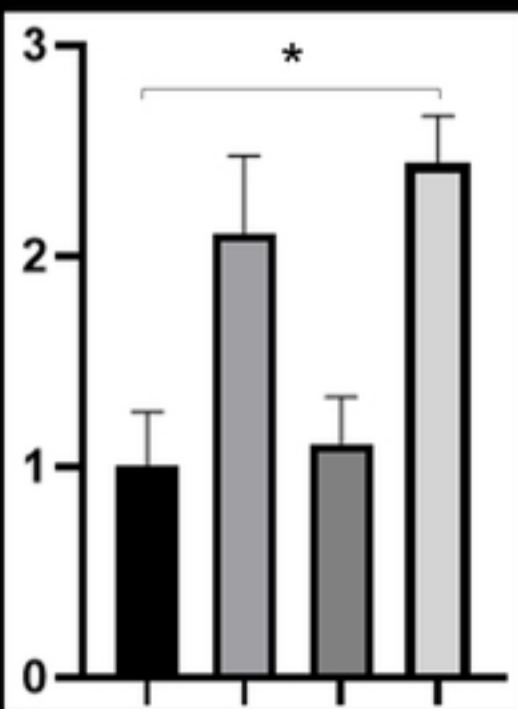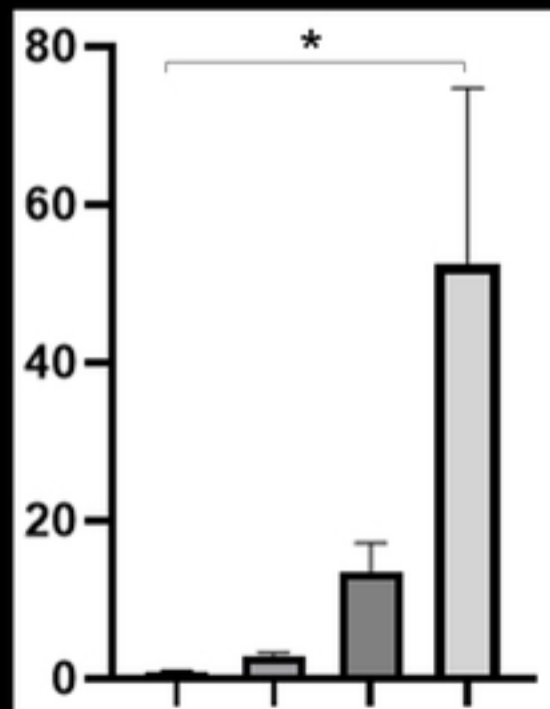

Figure 3

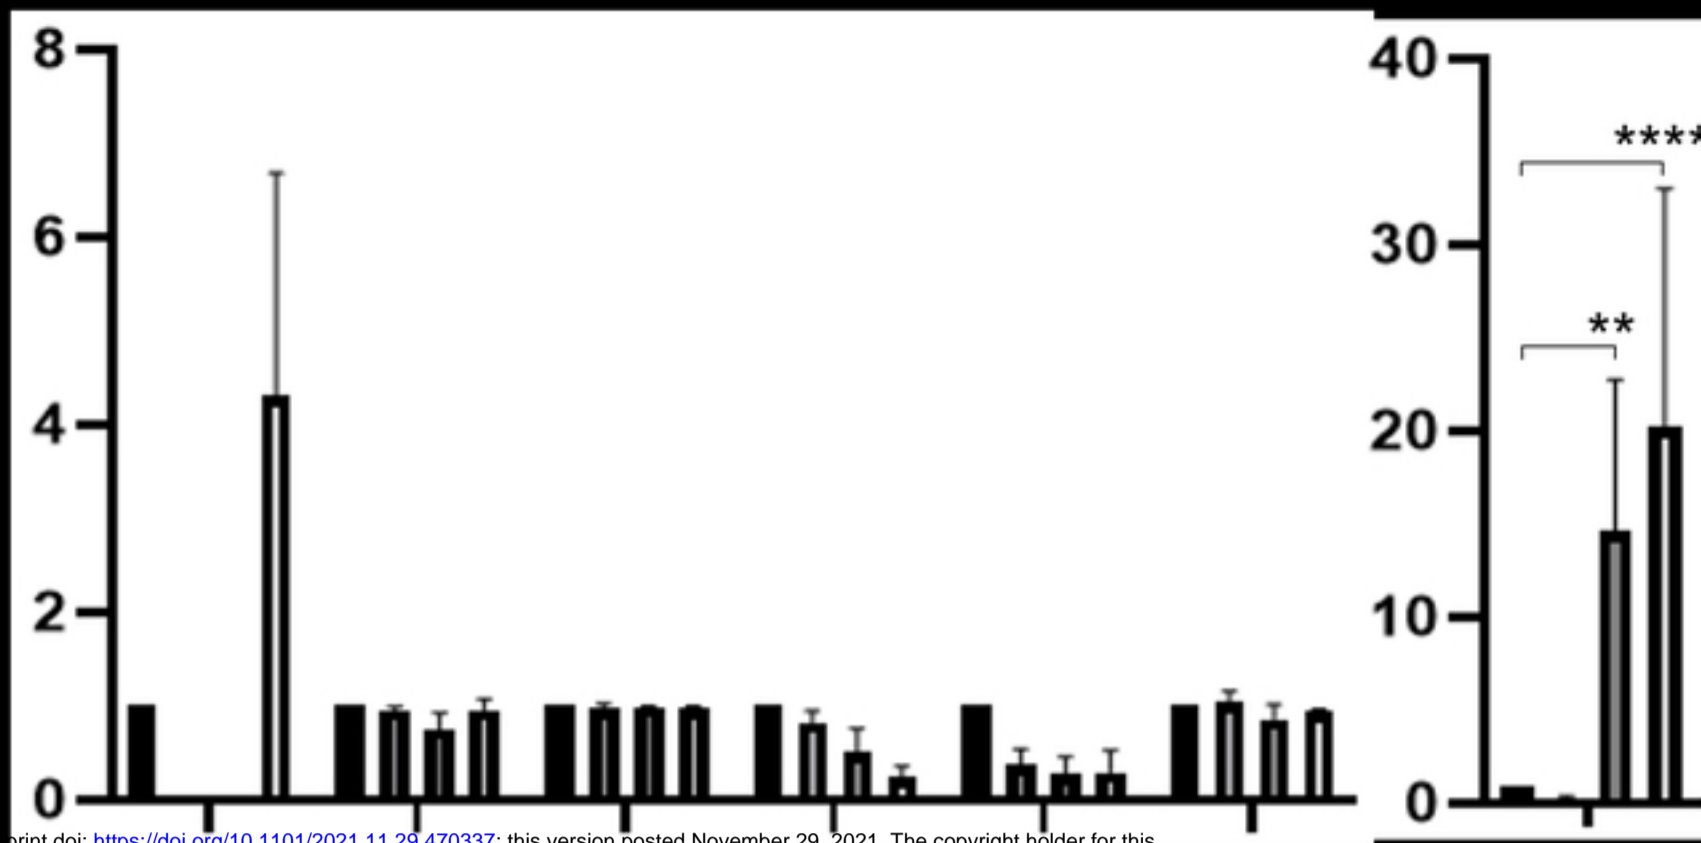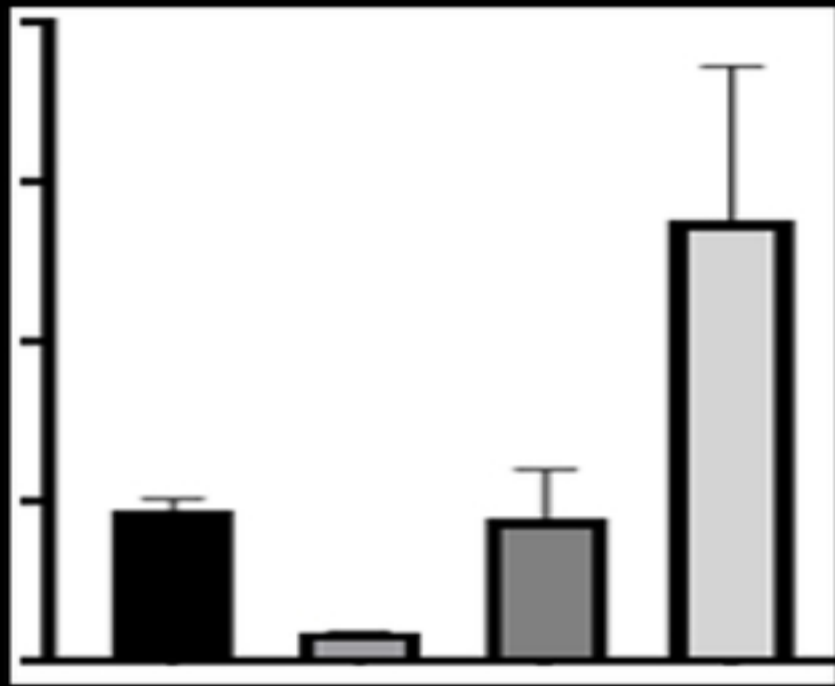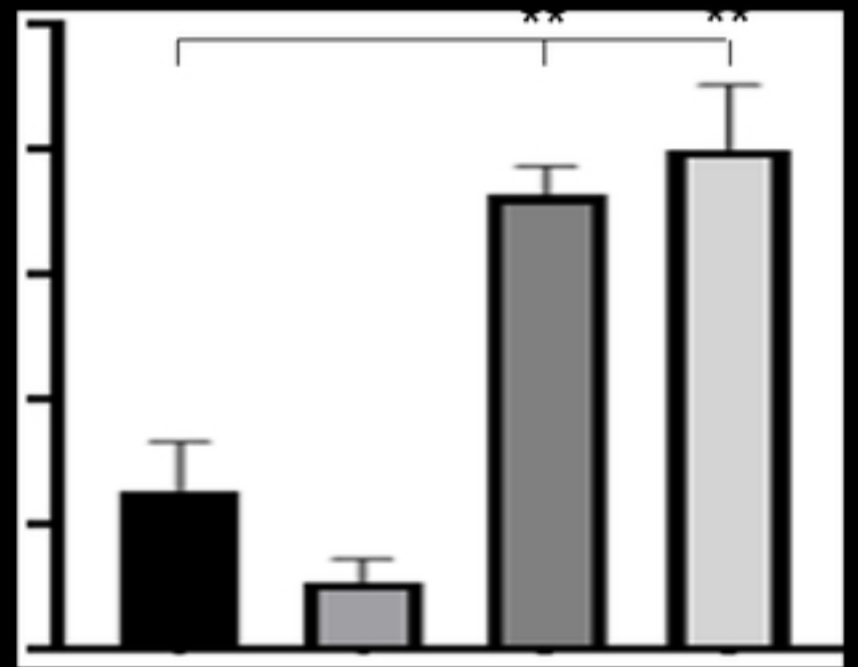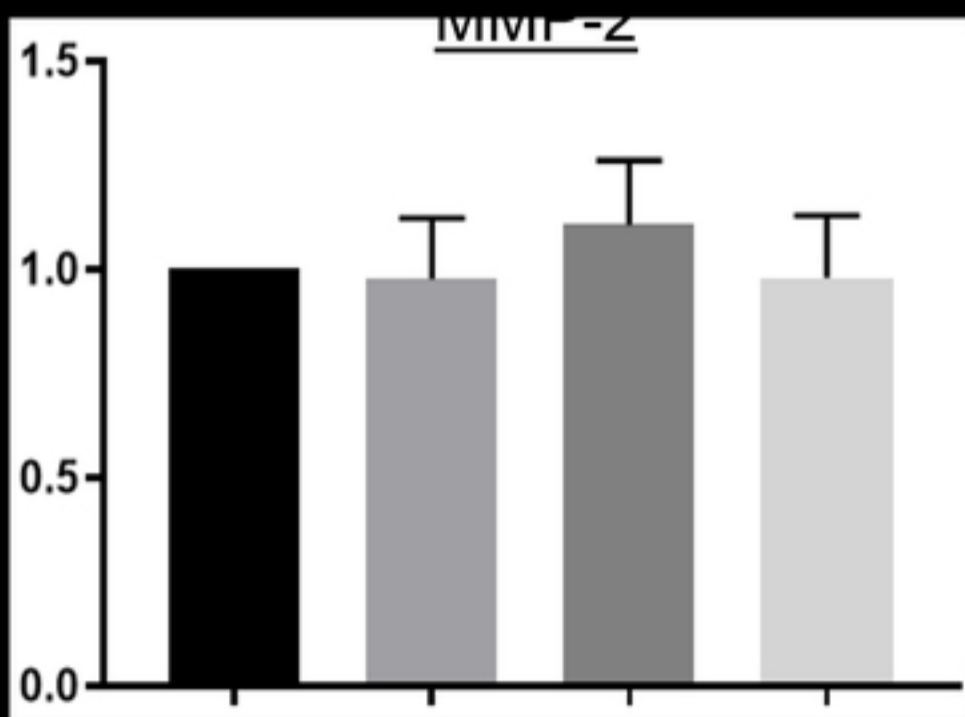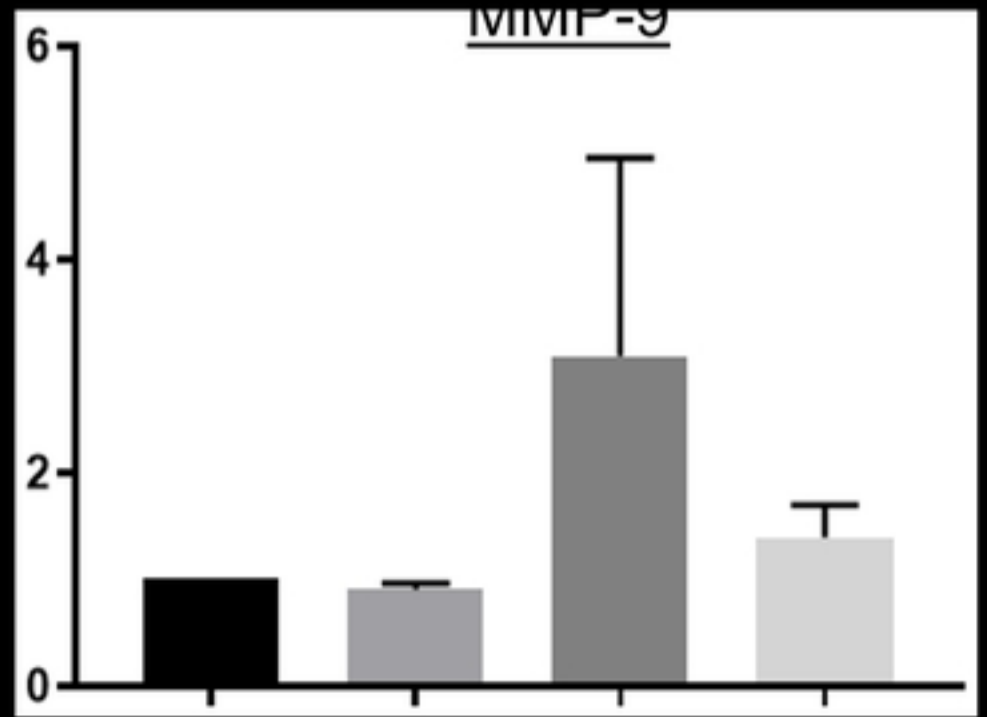

Figure 4



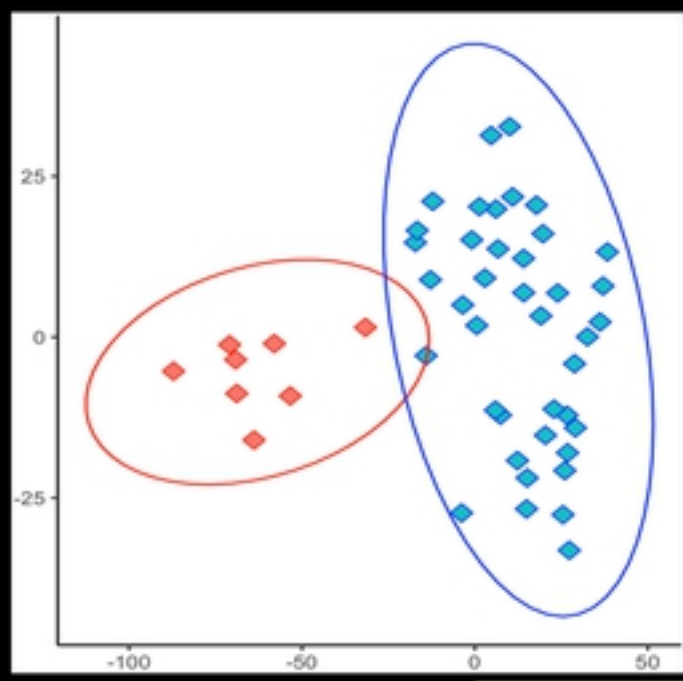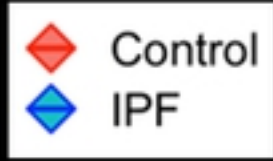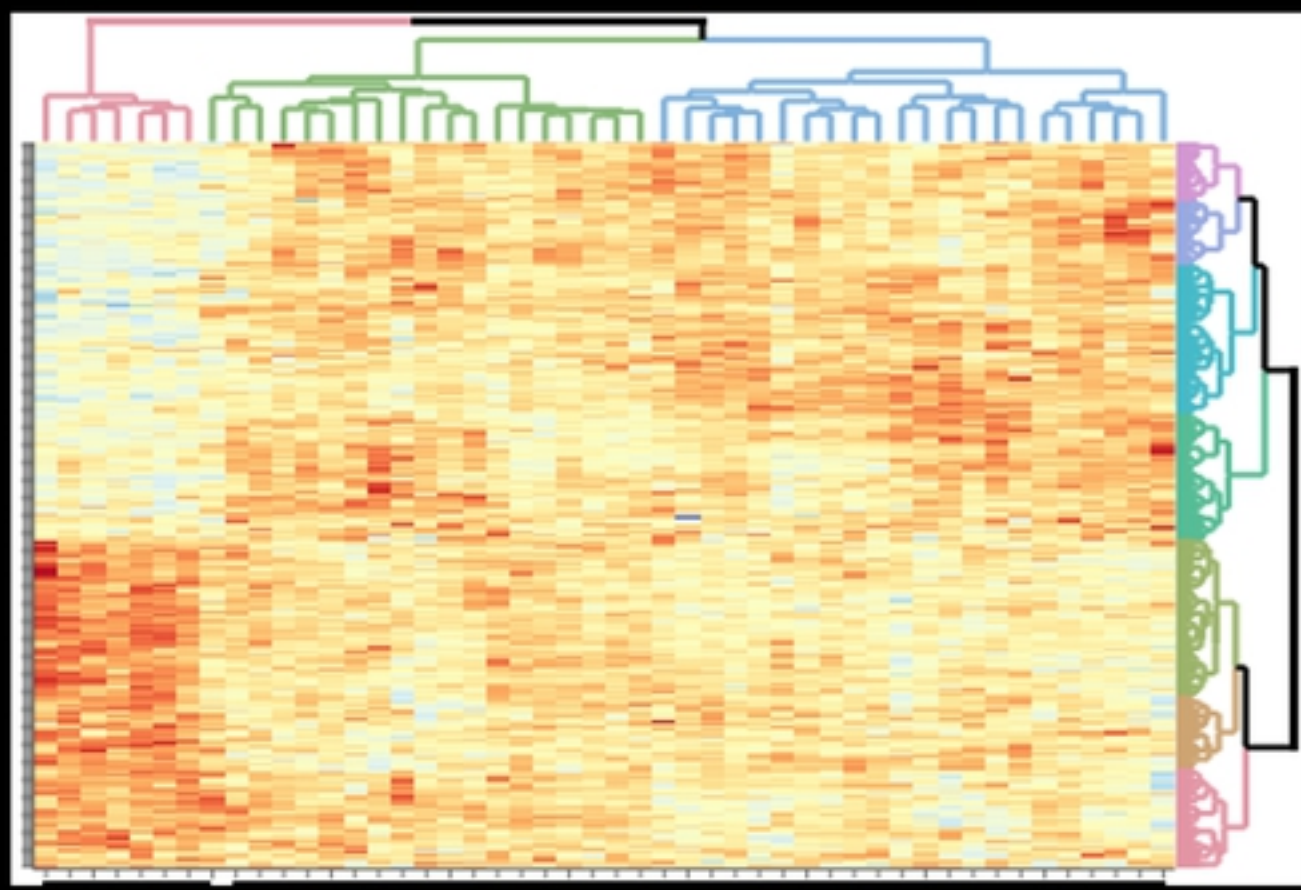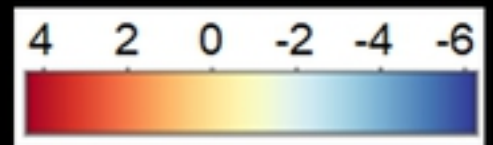

<https://doi.org/10.1101/2021.11.29.470337>

CC-BY 4.0 International license

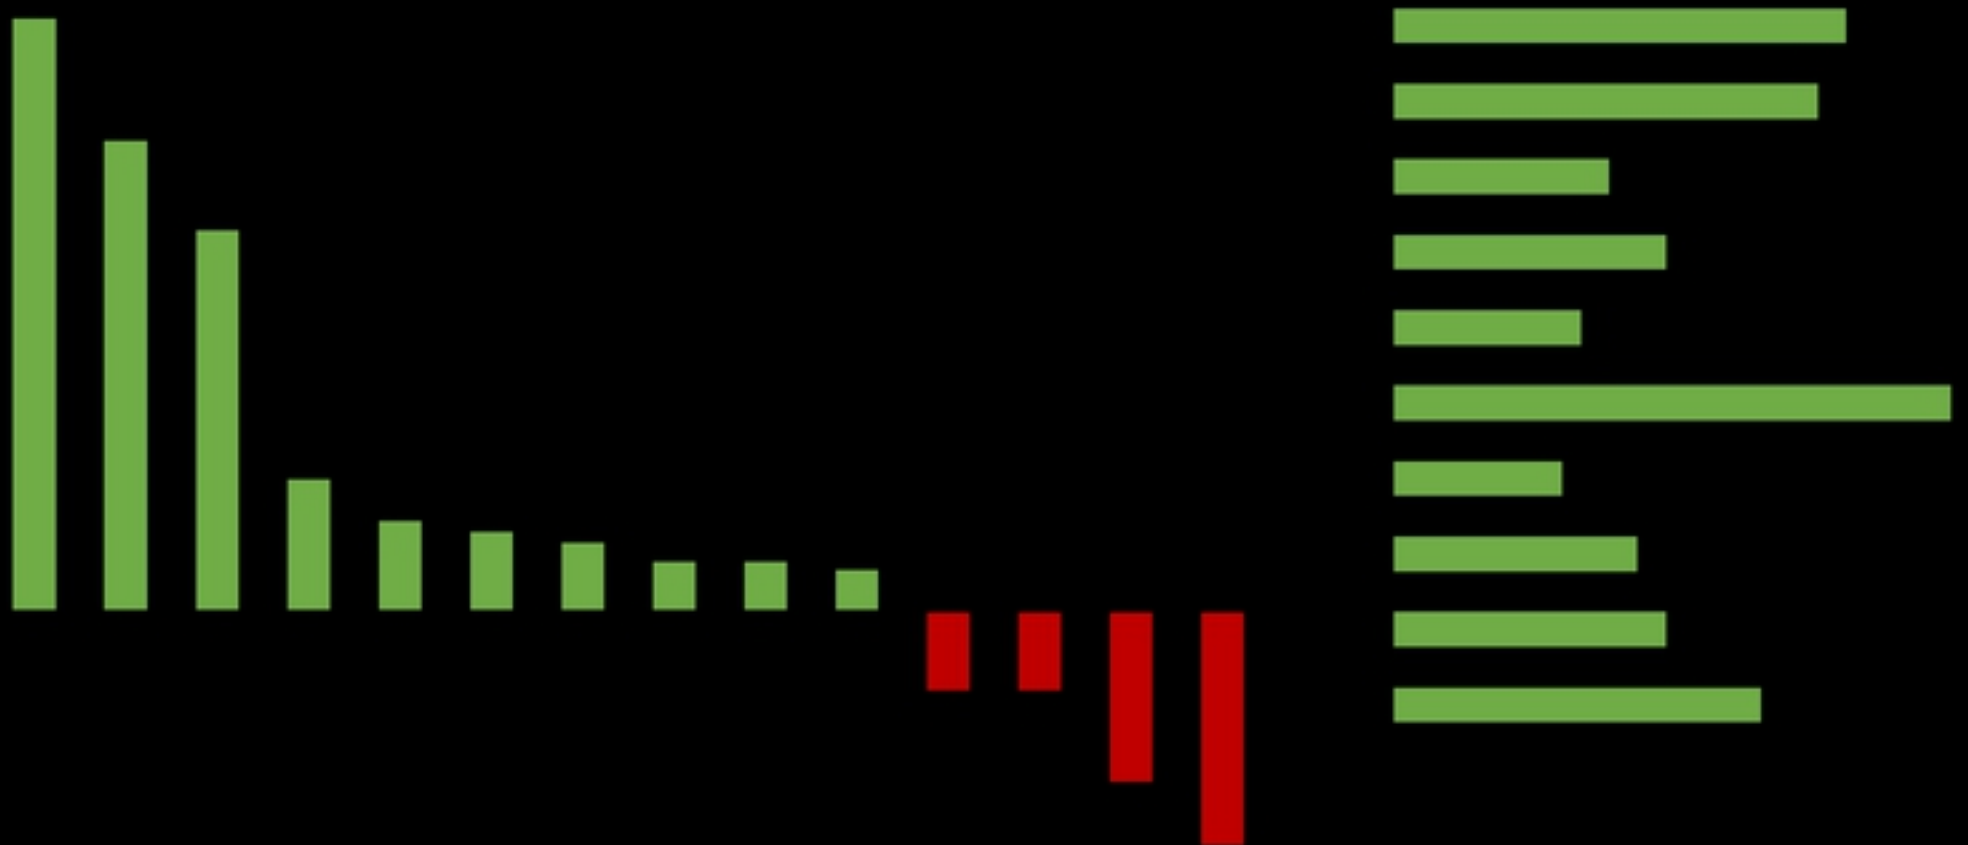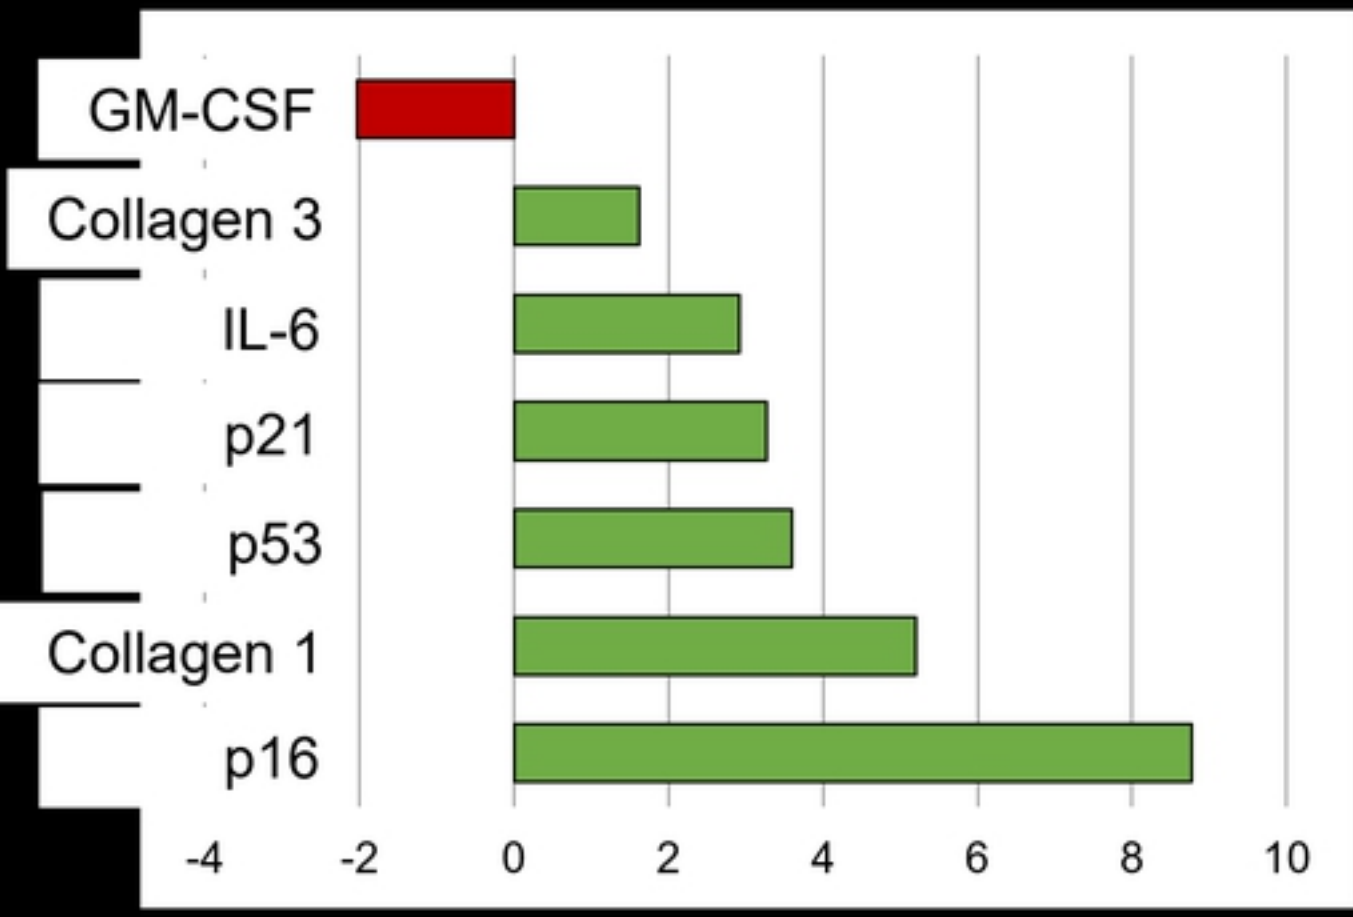

Figure 5
